# Supplementary material for: Utility of the number needed to treat in paediatric haematological cancer randomised controlled treatment trials: a systematic review
Source: PubMed Central journal article supplement — BMJ Open. 2019 Feb 20;9(2):e022839. doi: 10.1136/bmjopen-2018-022839 (PMC6398916; doi:10.1136/bmjopen-2018-022839), 2019-02-20
Supplement: bmjopen-2018-022839supp002.pdf [file bmjopen-2018-022839supp002.pdf]

## *Appendix A*

### **Study Protocol for the study: “Clinical significance in pediatric oncology randomized controlled treatment trials: A systematic review”**

#### ***Background:***

The sample size calculation of a randomized clinical trial (RCT) should be based on a delta value that reflects the minimal clinically important difference. The limited prior research suggests that RCTs in the literature do not provide sufficient information on clinical significance, including the use of a minimal clinically important difference, that enables readers to draw their own conclusions, nor do they provide their own interpretation of the clinical importance of their results. The degree to which clinical significance has been reported or determined in RCTs in pediatric cancer, a rare disease, remains unknown.

#### ***Primary Objective:***

Assess clinical significance in the pediatric oncology RCT literature by evaluating, 1) the relationship between the treatment effect and the delta value as reported in the sample size calculation, and 2) the concordance between statistical and clinical significance.

#### ***Methods:***

**Population:** Pediatric patients diagnosed with cancer and the primary outcome of the trial was a relevant cancer treatment outcome (e.g., a treatment regimen assessing overall survival, event-free survival, etc.).

#### **Study inclusion criteria:**

- RCTs that reported a sample size calculation where a delta value was reported or could be calculated for the randomized question.
- RCTs where the study population consisted of both pediatric and adult patients will be deemed eligible if adults were less than or equal to 25 years of age.
- Only the most recent RCT trial will be reported (i.e., in the event interim results are published).

#### **Study exclusion criteria:**

- RCTs that are long-term follow up studies.
- RCTs wherein the primary outcome are treatment complications or side effects, pharmacokinetic trials, toxicity trials, non-clinical interventions, or drug safety profile trials.
- RCTs which have a non-randomized component or a historical control.
- RCTs reported in a language other than English.

**Exposure:** Not applicable as this is a methodology systematic review.

**Comparator:** Not applicable as this is a methodology systematic review.

**Outcome:** Not applicable as this is a methodology systematic review.

#### **Study type:**

Randomized controlled trials

#### **Search strategy:**

A comprehensive literature review will be performed using the databases MEDLINE (Via Ovid), EMBASE (via OVID) and Cochrane Childhood Cancer Group Specialized Register (Via CENTRAL).

The reference lists / bibliographies of included studies will be searched. Databases will be searched from their conception until the present day (July 2016) and limited to the English language.

**Study Identification:**

Two investigators will screen the title and abstracts based on the specified inclusion criteria. The full text will then be retrieved and reviewed if the title and abstract is insufficient to determine fulfillment of inclusion criteria. Subsequently, one investigator will conduct a full text review to assess all of the studies that passed through the first round of title and abstract screening for inclusion eligibility. The principal investigator will be available to resolve any discrepancies or disagreements encountered during study selection.

**Study quality assessment checklist/assessment:** Not applicable as this is a methodology systematic review.

**Data extraction strategy:** Data will be manually entered into a standard data extraction template for each study and then analyzed. The data extraction template will be initially piloted on a sample of 15 included studies to ensure that pertinent information is captured and will then be subsequently finalized based on the results of this pilot.

**Synthesis of extracted data:**

SAS Version 9.4 will be used to perform the analysis of the extracted data.

**Search Strategies**

*EMBASE*

1. Randomized Controlled Trial.pt. or Pragmatic Clinical Trial.pt. or exp Randomized Controlled Trials as Topic/ or Randomized Controlled Trial (Topic) or Randomized Controlled Trial/ or Randomization/ or Random Allocation/ or Double-Blind Method/ or Double-Blind Procedure or Double-Blind Studies/ or Single-Blind Method/ or Single-Blind Procedure/ or Single-Blind Studies/ or Placebos/ or Placebo/ or (random\* or sham or placebo\*).ti,ab,hw,kf,kw. or ((singl\* or doubl\*) adj (blind\* or dumm\* or mask\*)).ti,ab,hw,kf,kw. rr ((tripl\* or trebl\*) adj (blind\* or dumm\* or mask\*)).ti,ab,hw,kf,kw.
2. leukemia or leukemi\* or leukaemi\* or (childhood ALL) or AML or lymphoma or lymphom\* or hodgkin OR hodgkin\* or T-cell or B-cell or non-hodgkin or sarcoma or sarcom\* or sarcoma, Ewing's or Ewing\* or osteosarcoma or osteosarcom\* or wilms tumor or wilms\* or nephroblastom\* or neuroblastoma or neuroblastom\* or rhabdomyosarcoma or rhabdomyosarcom\* or teratoma or teratom\* or hepatoma or hepatom\* or hepatoblastoma or hepatoblastom\* or PNET or medulloblastoma or medulloblastom\* or PNET\* or neuroectodermal tumors, primitive or retinoblastoma or retinoblastom\* or meningioma or meningiom\* or glioma or gliom\* or pediatric oncology or paediatric oncology or childhood cancer or childhood tumor or childhood tumors or brain tumor\* or brain tumour\* or brain neoplasms or central nervous system neoplasm or central nervous system neoplasms or central nervous system tumor\* or central nervous system tumour\* or brain cancer\* or brain neoplasm\* or intracranial neoplasm\* or leukemia lymphocytic acute or acute lymphoblastic leukemia/
3. cancer or cancers or cancer\* or oncology or oncolog\* or neoplasm or neoplasms or neoplasm\* or carcinoma or carcinom\* or tumor or tumour or tumor\* or tumour\* or tumors or tumours or malignan\* or malignant or hematooncological or hemato oncological or hemato-oncological or hematologic neoplasms or hematolo\*

4. 1 AND 2 AND 3
5. Limit 4 to Human/ English Language
6. Limit 5 to ("all infant (birth to 23 months)" or "all child (0 to 18 years)" or "newborn infant (birth to 1 month)" or "infant (1 to 23 months)" or "preschool child (2 to 5 years)" or "child (6 to 12 years)" or "adolescent (13 to 18 years)")
7. Final filter: Limit 7 to NOT IN MEDLINE

*MEDLINE*

1. Randomized Controlled Trial.pt. or Pragmatic Clinical Trial.pt. or exp Randomized Controlled Trials as Topic/ or Randomized Controlled Trial (Topic) or Randomized Controlled Trial/ or Randomization/ or Random Allocation/ or Double-Blind Method/ or Double-Blind Procedure or Double-Blind Studies/ or Single-Blind Method/ or Single-Blind Procedure/ or Single-Blind Studies/ or Placebos/ or Placebo/ or (random\* or sham or placebo\*).ti,ab,hw,kf,kw. or ((singl\* or doubl\*) adj (blind\* or dumm\* or mask\*)).ti,ab,hw,kf,kw. rr ((tripl\* or trebl\*) adj (blind\* or dumm\* or mask\*)).ti,ab,hw,kf,kw.
2. leukemia or leukemi\* or leukaemi\* or (childhood ALL) or AML or lymphoma or lymphom\* or hodgkin OR hodgkin\* or T-cell or B-cell or non-hodgkin or sarcoma or sarcom\* or sarcoma, Ewing's or Ewing\* or osteosarcoma or osteosarcom\* or wilms tumor or wilms\* or nephroblastom\* or neuroblastoma or neuroblastom\* or rhabdomyosarcoma or rhabdomyosarcom\* or teratoma or teratom\* or hepatoma or hepatom\* or hepatoblastoma or hepatoblastom\* or PNET or medulloblastoma or medulloblastom\* or PNET\* or neuroectodermal tumors, primitive or retinoblastoma or retinoblastom\* or meningioma or meningiom\* or glioma or gliom\* or pediatric oncology or paediatric oncology or childhood cancer or childhood tumor or childhood tumors or brain tumor\* or brain tumour\* or brain neoplasms or central nervous system neoplasm or central nervous system neoplasms or central nervous system tumor\* or central nervous system tumour\* or brain cancer\* or brain neoplasm\* or intracranial neoplasm\* or leukemia lymphocytic acute or acute lymphoblastic leukemia/
3. cancer or cancers or cancer\* or oncology or oncolog\* or neoplasm or neoplasms or neoplasm\* or carcinoma or carcinom\* or tumor or tumour or tumor\* or tumour\* or tumors or tumours or malignan\* or malignant or hematooncological or hemato oncological or hemato-oncological or hematologic neoplasms or hematolo\*
4. 1 AND 2 AND 3
5. Limit 4 to Human/ English Language
6. Limit 5 to ("all infant (birth to 23 months)" or "all child (0 to 18 years)" or "newborn infant (birth to 1 month)" or "infant (1 to 23 months)" or "preschool child (2 to 5 years)" or "child (6 to 12 years)" or "adolescent (13 to 18 years)")

*CENTRAL (Wiley)*

1. SR-CHILDCA

## ***Appendix B – List of included and excluded studies***

### **List of Included Studies:**

1. Alexander S, Kravka JM, Weitzman S, et al. Advanced stage anaplastic large cell lymphoma in children and adolescents: results of ANHL0131, a randomized phase III trial of APO versus a modified regimen with vinblastine: a report from the children's oncology group. *Pediatric Blood & Cancer* 2014;61(12):2236-42. doi: <http://dx.doi.org/10.1002/pbc.25187>
2. Balduzzi A, Valsecchi MG, Uderzo C, et al. Chemotherapy versus allogeneic transplantation for very-high-risk childhood acute lymphoblastic leukaemia in first complete remission: Comparison by genetic randomisation in an international prospective study. *Lancet* 2005;366(9486):635-42.
3. Brandalise SR, Pinheiro VR, Aguiar SS, et al. Benefits of the intermittent use of 6-mercaptopurine and methotrexate in maintenance treatment for low-risk acute lymphoblastic leukemia in children: randomized trial from the Brazilian Childhood Cooperative Group--protocol ALL-99. *Journal of Clinical Oncology* 2010;28(11):1911-18. doi: <http://dx.doi.org/10.1200/JCO.2009.25.6115>
4. Buchanan GR, Rivera GK, Pollock BH, et al. Alternating drug pairs with or without periodic reinduction in children with acute lymphoblastic leukemia in second bone marrow remission: a Pediatric Oncology Group Study. *Cancer* 2000;88(5):1166-74.
5. Conter V, Valsecchi MG, Silvestri D, et al. Pulses of vincristine and dexamethasone in addition to intensive chemotherapy for children with intermediate-risk acute lymphoblastic leukaemia: a multicentre randomised trial. *Lancet* 2007;369(9556):123-31.
6. Creutzig U, Dworzak M, Zimmermann M, et al. Randomised introduction of 2-CDA as intensification during consolidation for children with high-risk AML - Results from study AML-BFM 2004. *Klinische Padiatrie* 2015;227(3):116-22.
7. Creutzig U, Ritter J, Zimmermann M, et al. Improved treatment results in high-risk pediatric acute myeloid leukemia patients after intensification with high-dose cytarabine and mitoxantrone: Results of study acute myeloid Leukemia-Berlin-Frankfurt-Munster 93. *Journal of Clinical Oncology* 2001;19(10):2705-13.
8. Creutzig U, Zimmermann M, Bourquin J-P, et al. Randomized trial comparing liposomal daunorubicin with idarubicin as induction for pediatric acute myeloid leukemia: results from Study AML-BFM 2004. *Blood* 2013;122(1):37-43. doi: <http://dx.doi.org/10.1182/blood-2013-02-484097>
9. Creutzig U, Zimmermann M, Lehrnbecher T, et al. Less toxicity by optimizing chemotherapy, but not by addition of granulocyte colony-stimulating factor in children and adolescents with acute myeloid leukemia: Results of AML-BFM 98. *Journal of Clinical Oncology* 2006;24(27):4499-506.
10. Duval M, Suci S, Ferster A, et al. Comparison of Escherichia coli-asparaginase with Erwinia-asparaginase in the treatment of childhood lymphoid malignancies: results of a randomized European Organisation for Research and Treatment of Cancer-Children's Leukemia Group phase 3 trial. *Blood* 2002;99(8):2734-39.
11. Friedman DL, Chen L, Wolden S, et al. Dose-intensive response-based chemotherapy and radiation therapy for children and adolescents with newly diagnosed intermediate-risk hodgkin lymphoma: a report from the Children's Oncology Group Study AHOD0031. *Journal of Clinical Oncology* 2014;32(32):3651-58. doi: <http://dx.doi.org/10.1200/JCO.2013.52.5410>

12. Gaynon PS, Harris RE, Altman AJ, et al. Bone marrow transplantation versus prolonged intensive chemotherapy for children with acute lymphoblastic leukemia and an initial bone marrow relapse within 12 months of the completion of primary therapy: Children's Oncology Group study CCG-1941. *Journal of Clinical Oncology* 2006;24(19):3150-56.
13. Hann I, Vora A, Richards S, et al. Benefit of intensified treatment for all children with acute lymphoblastic leukaemia: results from MRC UKALL XI and MRC ALL97 randomised trials. UK Medical Research Council's Working Party on Childhood Leukaemia. *Leukemia* 2000;14(3):356-63.
14. Harris MB, Shuster JJ, Pullen DJ, et al. Consolidation therapy with antimetabolite-based therapy in standard-risk acute lymphocytic leukemia of childhood: a Pediatric Oncology Group Study. *Journal of Clinical Oncology* 1998;16(8):2840-47.
15. Hill FGH, Richards S, Gibson B, et al. Successful treatment without cranial radiotherapy of children receiving intensified chemotherapy for acute lymphoblastic leukaemia: results of the risk-stratified randomized central nervous system treatment trial MRC UKALL XI (ISRC TN 16757172). *British journal of haematology* 2004;124(1):33-46.
16. Hvizdala EV, Berard C, Callihan T, et al. Lymphoblastic lymphoma in children--a randomized trial comparing LSA2-L2 with the A-COP+ therapeutic regimen: a Pediatric Oncology Group Study. *Journal of Clinical Oncology* 1988;6(1):26-33.
17. Kung FH, Schwartz CL, Ferree CR, et al. POG 8625: a randomized trial comparing chemotherapy with chemoradiotherapy for children and adolescents with Stages I, IIA, IIIA1 Hodgkin Disease: a report from the Children's Oncology Group. *Journal of Pediatric Hematology/Oncology* 2006;28(6):362-68.
18. Lange BJ, Blatt J, Sather HN, et al. Randomized comparison of moderate-dose methotrexate infusions to oral methotrexate in children with intermediate risk acute lymphoblastic leukemia: a Children's Cancer Group study. *Medical & Pediatric Oncology* 1996;27(1):15-20.
19. Lange BJ, Yang RK, Gan J, et al. Soluble interleukin-2 receptor alpha activation in a Children's Oncology Group randomized trial of interleukin-2 therapy for pediatric acute myeloid leukemia. *Pediatric Blood & Cancer* 2011;57(3):398-405. doi: <http://dx.doi.org/10.1002/pbc.22966>
20. Lanino E, Rondelli R, Locatelli F, et al. Early (day -7) versus conventional (day -1) inception of cyclosporine-A for graft-versus-host disease prophylaxis after unrelated donor hematopoietic stem cell transplantation in children. Long-term results of an AIEOP prospective, randomized study. *Biology of blood and marrow transplantation : journal of the American Society for Blood and Marrow Transplantation* 2009;15(6):741-8. doi: 10.1016/j.bbmt.2009.03.004 [published Online First: 2009/05/20]
21. Lauer SJ, Shuster JJ, Mahoney Jr DH, et al. A comparison of early intensive methotrexate/mercaptopurine with early intensive alternating combination chemotherapy for high-risk B-precursor acute lymphoblastic leukemia: A Pediatric Oncology Group phase III randomized trial. *Leukemia* 2001;15(7):1038-45.
22. Laver JH, Kravaka JM, Hutchison RE, et al. Advanced-stage large-cell lymphoma in children and adolescents: results of a randomized trial incorporating intermediate-dose methotrexate and high-dose cytarabine in the maintenance phase of the APO regimen: a Pediatric Oncology Group phase III trial. *Journal of Clinical Oncology* 2005;23(3):541-47.

23. Laver JH, Mahmoud H, Pick TE, et al. Results of a randomized phase III trial in children and adolescents with advanced stage diffuse large cell non-Hodgkin's lymphoma: a Pediatric Oncology Group study. *Leukemia & lymphoma* 2002;43(1):105-09.
24. Le Deley M-C, Rosolen A, Williams DM, et al. Vinblastine in children and adolescents with high-risk anaplastic large-cell lymphoma: results of the randomized ALCL99-vinblastine trial. *Journal of Clinical Oncology* 2010;28(25):3987-93. doi: <http://dx.doi.org/10.1200/JCO.2010.28.5999>
25. Mahoney DH, Jr., Shuster J, Nitschke R, et al. Intermediate-dose intravenous methotrexate with intravenous mercaptopurine is superior to repetitive low-dose oral methotrexate with intravenous mercaptopurine for children with lower-risk B-lineage acute lymphoblastic leukemia: a Pediatric Oncology Group phase III trial. *Journal of Clinical Oncology* 1998;16(1):246-54.
26. Mahoney DH, Jr., Shuster JJ, Nitschke R, et al. Intensification with intermediate-dose intravenous methotrexate is effective therapy for children with lower-risk B-precursor acute lymphoblastic leukemia: A Pediatric Oncology Group study. *Journal of Clinical Oncology* 2000;18(6):1285-94.
27. Mitchell CD, Richards SM, Kinsey SE, et al. Benefit of dexamethasone compared with prednisolone for childhood acute lymphoblastic leukaemia: Results of the UK Medical Research Council ALL97 randomized trial. *British journal of haematology* 2005;129(6):734-45.
28. Mondelaers V, Suci S, De Moerloose B, et al. Prolonged versus standard native *E. coli* asparaginase therapy in childhood acute lymphoblastic leukemia and non-Hodgkin lymphoma: final results of the EORTC-CLG randomized phase III trial 58951. *Haematologica* 2017;102(10):1727-38. doi: <https://dx.doi.org/10.3324/haematol.2017.165845>
29. Moricke A, Zimmermann M, Valsecchi MG, et al. Dexamethasone vs prednisone in induction treatment of pediatric ALL: results of the randomized trial AIEOP-BFM ALL 2000. *Blood* 2016;127(17):2101-12. doi: <https://dx.doi.org/10.1182/blood-2015-09-670729>
30. Nachman J, Sather HN, Cherlow JM, et al. Response of children with high-risk acute lymphoblastic leukemia treated with and without cranial irradiation: a report from the Children's Cancer Group. *Journal of Clinical Oncology* 1998;16(3):920-30.
31. Nachman JB, Sather HN, Sensel MG, et al. Augmented post-induction therapy for children with high-risk acute lymphoblastic leukemia and a slow response to initial therapy. *New England Journal of Medicine* 1998;338(23):1663-71.
32. Nachman JB, Sposto R, Herzog P, et al. Randomized comparison of low-dose involved-field radiotherapy and no radiotherapy for children with Hodgkin's disease who achieve a complete response to chemotherapy. *Journal of Clinical Oncology* 2002;20(18):3765-71.
33. Nagatoshi Y, Matsuzaki A, Suminoe A, et al. Randomized trial to compare LSA2L2-type maintenance therapy to daily 6-mercaptopurine and weekly methotrexate with vincristine and dexamethasone pulse for children with acute lymphoblastic leukemia. *Pediatric Blood & Cancer* 2010;55(2):239-47. doi: <http://dx.doi.org/10.1002/pbc.22528>
34. Pieters R, Schrappe M, De Lorenzo P, et al. A treatment protocol for infants younger than 1 year with acute lymphoblastic leukaemia (Interfant-99): an observational study and a multicentre randomised trial. *Lancet* 2007;370(9583):240-50. doi: 10.1016/s0140-6736(07)61126-x [published Online First: 2007/07/31]

35. Ribera JM, Ortega JJ, Oriol A, et al. Comparison of intensive chemotherapy, allogeneic, or autologous stem-cell transplantation as postremission treatment for children with very high risk acute lymphoblastic leukemia: PETHEMA ALL-93 trial. *Journal of Clinical Oncology* 2007;25(1):16-24.
36. Sadowitz PD, Smith SD, Shuster J, et al. Treatment of late bone marrow relapse in children with acute lymphoblastic leukemia: a Pediatric Oncology Group study. *Blood* 1993;81(3):602-09.
37. Sposto R, Meadows AT, Chilcote RR, et al. Comparison of long-term outcome of children and adolescents with disseminated non-lymphoblastic non-hodgkin lymphoma treated with COMP or daunomycin-comp: A report from the children's cancer group. *Medical and pediatric oncology* 2001;37(5):432-41.
38. Sullivan MP, Fuller LM, Berard C, et al. Comparative effectiveness of two combined modality regimens in the treatment of surgical stage III Hodgkin's disease in children. An 8-year follow-up study by the Pediatric Oncology Group. *American Journal of Pediatric Hematology/Oncology* 1991;13(4):450-58.
39. van der Werff ten Bosch J, Suci S, Thyss A, et al. Value of intravenous 6-mercaptopurine during continuation treatment in childhood acute lymphoblastic leukemia and non-Hodgkin's lymphoma: Final results of a randomized phase III trial (58881) of the EORTC CLG. *Leukemia* 2005;19(5):721-26.
40. Von Stackelberg A, Hartmann R, Buhrer C, et al. High-dose compared with intermediate-dose methotrexate in children with a first relapse of acute lymphoblastic leukemia. *Blood* 2008;111(5):2573-80.
41. Vora A, Goulden N, Mitchell C, et al. Augmented post-remission therapy for a minimal residual disease-defined high-risk subgroup of children and young people with clinical standard-risk and intermediate-risk acute lymphoblastic leukaemia (UKALL 2003): a randomised controlled trial. *Lancet Oncology* 2014;15(8):809-18. doi: [http://dx.doi.org/10.1016/S1470-2045\(14\)70243-8](http://dx.doi.org/10.1016/S1470-2045(14)70243-8)
42. Wagner JE, Eapen M, Carter S, et al. One-unit versus two-unit cord-blood transplantation for hematologic cancers. *New England Journal of Medicine* 2014;371(18):1685-94.
43. Woods WG, Kobrinsky N, Buckley JD, et al. Timed-sequential induction therapy improves postremission outcome in acute myeloid leukemia: a report from the Children's Cancer Group. *Blood* 1996;87(12):4979-89.

### List of Excluded Studies:

1. Treatment of acute lymphoblastic leukaemia: effect of variation in length of treatment on duration of remission. Report to the Medical Research Council by the Working Party on Leukaemia in Childhood. *British medical journal* 1977;2(6085):495-97.
2. Randomized trial of adjuvant chemotherapy in osteogenic osteosarcoma: comparison of altering sequential administrations of high doses of adriamycin, methotrexate, and cyclophosphamide with a 6-month administration of high-dose adriamycin followed by a low-dose semicontinuous chemotherapy. EORTC Osteosarcoma Working Party Group. *Recent results in cancer research/Fortschritte der Krebsforschung/Progres dans les recherches sur le cancer* 1978;68:28-32.
3. The treatment of acute lymphoblastic leukaemia (ALL) in childhood, UKALL III: the effects of added cytosine arabinoside and/or asparaginase, and a comparison of continuous or discontinuous mercaptopurine in regimens for standard risk ALL. *Medical and pediatric oncology* 1982;10(5):501-10.
4. Duration of chemotherapy in childhood acute lymphoblastic leukaemia. The Medical Research Council's Working Party on Leukaemia in Childhood. *Medical & Pediatric Oncology* 1982;10(5):511-20.
5. Adamson PC, Matthay KK, O'Brien M, et al. A phase 2 trial of all-trans-retinoic acid in combination with interferon-alpha2a in children with recurrent neuroblastoma or wilms tumor: A pediatric oncology branch, NCI and children's oncology group study. *Pediatric Blood and Cancer* 2007;49(5):661-65.
6. Aly MMD, Hamza AF, Abdel Kader HM, et al. Therapeutic superiority of combined propranolol with short steroids course over propranolol monotherapy in infantile hemangioma. *European journal of pediatrics* 2015;174(11):1503-09.
7. Amadori S, Testi AM, Arico M, et al. Prospective comparative study of bone marrow transplantation and postremission chemotherapy for childhood acute myelogenous leukemia. The Associazione Italiana Ematologia ed Oncologia Pediatrica Cooperative Group. *Journal of Clinical Oncology* 1993;11(6):1046-54.
8. Amylon MD, Shuster J, Pullen J, et al. Intensive high-dose asparaginase consolidation improves survival for pediatric patients with T cell acute lymphoblastic leukemia and advanced stage lymphoblastic lymphoma: A Pediatric Oncology Group study. *Leukemia* 1999;13(3):335-42.
9. Anderson J, Krivit W, Chilcote R, et al. Comparison of the therapeutic response of patients with childhood acute lymphoblastic leukemia in relapse to vindesine versus vincristine in combination with prednisone and L-asparaginase: a phase III trial. *Cancer treatment reports* 1981;65(11-12):1015-19.
10. Anderson JR, Wilson JF, Jenkin DT, et al. Childhood non-Hodgkin's lymphoma. The results of a randomized therapeutic trial comparing a 4-drug regimen (COMP) with a 10-drug regimen (LSA2-L2). *New England Journal of Medicine* 1983;308(10):559-65.
11. Andre MPE, Girinsky T, Federico M, et al. Early Positron Emission Tomography Response-Adapted Treatment in Stage I and II Hodgkin Lymphoma: Final Results of the Randomized EORTC/LYSA/FIL H10 Trial. *Journal of Clinical Oncology* 2017;35(16):1786-94. doi: <https://dx.doi.org/10.1200/JCO.2016.68.6394>
12. Arico M, Valsecchi MG, Rizzari C, et al. Long-term results of the AIEOP-ALL-95 trial for childhood acute lymphoblastic leukemia: Insight on the prognostic value of DNA index in the framework of Berlin-Frankfurt-Muenster-based chemotherapy. *Journal of Clinical Oncology* 2008;26(2):283-89.



13. Arndt CAS, Stoner JA, Hawkins DS, et al. Vincristine, actinomycin, and cyclophosphamide compared with vincristine, actinomycin, and cyclophosphamide alternating with vincristine, topotecan, and cyclophosphamide for intermediate-risk rhabdomyosarcoma: Children's Oncology Group Study D9803. *Journal of Clinical Oncology* 2009;27(31):5182-88.
14. Asselin BL, Devidas M, Chen L, et al. Cardioprotection and Safety of Dexrazoxane in Patients Treated for Newly Diagnosed T-Cell Acute Lymphoblastic Leukemia or Advanced-Stage Lymphoblastic Non-Hodgkin Lymphoma: A Report of the Children's Oncology Group Randomized Trial Pediatric Oncology Group 9404. *Journal of Clinical Oncology* 2016;34(8):854-62. doi: <https://dx.doi.org/10.1200/JCO.2015.60.8851>
15. Asselin BL, Devidas M, Wang C, et al. Effectiveness of high-dose methotrexate in T-cell lymphoblastic leukemia and advanced-stage lymphoblastic lymphoma: a randomized study by the Children's Oncology Group (POG 9404). *Blood* 2011;118(4):874-83. doi: <http://dx.doi.org/10.1182/blood-2010-06-292615>
16. Asselin BL, Kreissman S, Coppola DJ, et al. Prognostic significance of early response to a single dose of asparaginase in childhood acute lymphoblastic leukemia. *Journal of Pediatric Hematology/Oncology* 1999;21(1):6-12.
17. Ater JL, Zhou T, Holmes E, et al. Randomized study of two chemotherapy regimens for treatment of low-grade glioma in young children: A report from the Children's Oncology Group. *Journal of Clinical Oncology* 2012;30(21):2641-47.
18. Attarbaschi A, Panzer-Grumayer R, Mann G, et al. Minimal residual disease-based treatment is adequate for relapse-prone childhood acute lymphoblastic leukemia with an intrachromosomal amplification of chromosome 21: the experience of the ALL-BFM 2000 trial. *Klinische Padiatrie* 2014;226(6-7):338-43. doi: <http://dx.doi.org/10.1055/s-0034-1387795>
19. Aur RJ, Simone JV, Hustu HO, et al. A comparative study of central nervous system irradiation and intensive chemotherapy early in remission of childhood acute lymphocytic leukemia. *Cancer* 1972;29(2):381-91.
20. Aur RJ, Simone JV, Verzosa MS, et al. Childhood acute lymphocytic leukemia: study VIII. *Cancer* 1978;42(5):2123-34.
21. Avramis VI, Sencer S, Periclou AP, et al. A randomized comparison of native Escherichia coli asparaginase and polyethylene glycol conjugated asparaginase for treatment of children with newly diagnosed standard-risk acute lymphoblastic leukemia: a Children's Cancer Group study. *Blood* 2002;99(6):1986-94.
22. Awada A, Colomer R, Inoue K, et al. Neratinib Plus Paclitaxel vs Trastuzumab Plus Paclitaxel in Previously Untreated Metastatic ERBB2-Positive Breast Cancer: The NEfERT-T Randomized Clinical Trial. *JAMA Oncol* 2016;2(12):1557-64. doi: <https://dx.doi.org/10.1001/jamaoncol.2016.0237>
23. Bailey CC, Gnekow A, Wellek S, et al. Prospective randomised trial of chemotherapy given before radiotherapy in childhood medulloblastoma. International Society of Paediatric Oncology (SIOP) and the (German) Society of Paediatric Oncology (GPO): SIOP II. *Medical & Pediatric Oncology* 1995;25(3):166-78.
24. Balzarotti M, Brusamolino E, Angelucci E, et al. B-IGEV (bortezomib plus IGEV) versus IGEV before high-dose chemotherapy followed by autologous stem cell transplantation in relapsed or refractory

- Hodgkin lymphoma: a randomized, phase II trial of the Fondazione Italiana Linfomi (FIL). *Leukemia & Lymphoma* 2016;57(10):2375-81. doi: <https://dx.doi.org/10.3109/10428194.2016.1140161>
25. Barry EV, Vrooman LM, Dahlberg SE, et al. Absence of secondary malignant neoplasms in children with high-risk acute lymphoblastic leukemia treated with dexrazoxane. *Journal of Clinical Oncology* 2008;26(7):1106-11. doi: <http://dx.doi.org/10.1200/JCO.2007.12.2481>
26. Batra V, Sands SA, Holmes E, et al. Long-term survival of children less than six years of age enrolled on the ccg-945 phase iii trial for newly-diagnosed high-grade glioma: A report from the children's oncology group. *Pediatric Blood and Cancer* 2014;61(1):151-57.
27. Baum E, Sather H, Nachman J. Relapse rates following cessation of chemotherapy during complete remission of acute lymphocytic leukemia. A report from Children's Cancer Study Group. *Medical and pediatric oncology* 1979;7(1):25-34.
28. Becton D, Dahl GV, Ravindranath Y, et al. Randomized use of cyclosporin A (CsA) to modulate P-glycoprotein in children with AML in remission: Pediatric Oncology Group Study 9421. *Blood* 2006;107(4):1315-24.
29. Bernstein ML, Devidas M, Lafreniere D, et al. Intensive therapy with growth factor support for patients with Ewing tumor metastatic at diagnosis: Pediatric Oncology Group/Children's Cancer Group Phase II Study 9457--a report from the Children's Oncology Group. *Journal of Clinical Oncology* 2006;24(1):152-59.
30. Bertolone SJ, Yates AJ, Boyett JM, et al. Combined modality therapy for poorly differentiated gliomas of the posterior fossa in children: a Children's Cancer Group report. *Journal of neuro-oncology* 2003;63(1):49-54.
31. Bhatia S, Krailo MD, Chen Z, et al. Therapy-related myelodysplasia and acute myeloid leukemia after Ewing sarcoma and primitive neuroectodermal tumor of bone: A report from the Children's Oncology Group. *Blood* 2007;109(1):46-51.
32. Bhatla D, Gerbing RB, Alonzo TA, et al. Cytidine deaminase genotype and toxicity of cytosine arabinoside therapy in children with acute myeloid leukemia. *British journal of haematology* 2009;144(3):388-94.
33. Bhatla D, Gerbing RB, Alonzo TA, et al. DNA repair polymorphisms and outcome of chemotherapy for acute myelogenous leukemia: A report from the Children's Oncology Group. *Leukemia* 2008;22(2):265-72.
34. Biondi A, Schrappe M, De Lorenzo P, et al. Imatinib after induction for treatment of children and adolescents with Philadelphia-chromosome-positive acute lymphoblastic leukaemia (EsPhALL): a randomised, open-label, intergroup study. *Lancet Oncology* 2012;13(9):936-45. doi: [http://dx.doi.org/10.1016/S1470-2045\(12\)70377-7](http://dx.doi.org/10.1016/S1470-2045(12)70377-7)
35. Bleyer WA, Sather HN, Nickerson HJ, et al. Monthly pulses of vincristine and prednisone prevent bone marrow and testicular relapse in low-risk childhood acute lymphoblastic leukemia: a report of the CCG-161 study by the Children's Cancer Study Group. *Journal of Clinical Oncology* 1991;9(6):1012-21.
36. Boissel N, Auclerc MF, Lheritier V, et al. Should adolescents with acute lymphoblastic leukemia be treated as old children or young adults? Comparison of the French FRALLE-93 and LALA-94 trials.

*Journal of clinical oncology : official journal of the American Society of Clinical Oncology*  
2003;21(5):774-80.

37. Bond M, Bernstein ML, Pappo A, et al. A phase II study of imatinib mesylate in children with refractory or relapsed solid tumors: A children's oncology group study. *Pediatric Blood and Cancer* 2008;50(2):254-58.
38. Borowitz MJ, Wood BL, Devidas M, et al. Prognostic significance of minimal residual disease in high risk B-ALL: a report from Children's Oncology Group study AALL0232. *Blood* 2015;126(8):964-71. doi: <http://dx.doi.org/10.1182/blood-2015-03-633685>
39. Bostrom BC, Sensel MR, Sather HN, et al. Dexamethasone versus prednisone and daily oral versus weekly intravenous mercaptopurine for patients with standard-risk acute lymphoblastic leukemia: a report from the Children's Cancer Group. *Blood* 2003;101(10):3809-17.
40. Bradley KA, Pollack IF, Reid JM, et al. Motexafin gadolinium and involved field radiation therapy for intrinsic pontine glioma of childhood: A Children's Oncology Group phase i study. *Neuro-oncology* 2008;10(5):752-58.
41. Brecher ML, Schwenn MR, Coppes MJ, et al. Fractionated cylophosphamide and back to back high dose methotrexate and cytosine arabinoside improves outcome in patients with stage III high grade small non-cleaved cell lymphomas (SNCCCL): a randomized trial of the Pediatric Oncology Group. *Medical & Pediatric Oncology* 1997;29(6):526-33.
42. Brecher ML, Weinberg V, Boyett JM, et al. Intermediate dose methotrexate in childhood acute lymphoblastic leukemia resulting in decreased incidence of testicular relapse. *Cancer* 1986;58(5):1024-28.
43. Breitfeld PP, Lyden E, Raney RB, et al. Ifosfamide and etoposide are superior to vincristine and melphalan for pediatric metastatic rhabdomyosarcoma when administered with irradiation and combination chemotherapy: A report from the Intergroup Rhabdomyosarcoma Study Group. *Journal of Pediatric Hematology/Oncology* 2001;23(4):225-33.
44. Brugieres L, Le Deley M-C, Rosolen A, et al. Impact of the methotrexate administration dose on the need for intrathecal treatment in children and adolescents with anaplastic large-cell lymphoma: results of a randomized trial of the EICNHL Group. *Journal of Clinical Oncology* 2009;27(6):897-903. doi: <http://dx.doi.org/10.1200/JCO.2008.18.1487>
45. Buchanan GR, Boyett JM, Pollock BH, et al. Improved treatment results in boys with overt testicular relapse during or shortly after initial therapy for acute lymphoblastic leukemia. A Pediatric Oncology group study. *Cancer* 1991;68(1):48-55.
46. Bunin N, Aplenc R, Kamani N, et al. Randomized trial of busulfan vs total body irradiation containing conditioning regimens for children with acute lymphoblastic leukemia: A pediatric blood and marrow transplant consortium study. *Bone marrow transplantation* 2003;32(6):543-48.
47. Cairo MS, Gerrard M, Sposto R, et al. Results of a randomized international study of high-risk central nervous system B non-Hodgkin lymphoma and B acute lymphoblastic leukemia in children and adolescents. *Blood* 2007;109(7):2736-43.
48. Cairo MS, Sposto R, HooverRegan M, et al. Childhood and adolescent large-cell lymphoma (LCL): A review of the Children's Cancer Group experience. *American Journal of Hematology* 2003;72(1):53-63.

49. Calandra T, Gaya H, Zinner SH, et al. Monotherapy with meropenem versus combination therapy with ceftazidime plus amikacin as empiric therapy for fever in granulocytopenic patients with cancer. *Antimicrobial Agents and Chemotherapy* 1996;40(5):1108-15.
50. Camitta BM, Pinkel D, Thatcher LG. Failure of early intensive chemotherapy to improve prognosis in childhood acute lymphocytic leukemia. *Medical and pediatric oncology* 1980;8(4):383-89.
51. Cangir A, Ragab AH, Steuber P. Combination chemotherapy with vincristine (NSC-67574), procarbazine (NSC-77213), prednisone (NSC-10023) with or without nitrogen mustard (NSC-762)(MOPP vs OPP) in children with recurrent brain tumors. *Medical and pediatric oncology* 1984;12(1):1-3.
52. Carli M, Pastore G, Perilongo G, et al. Tumor response and toxicity after single high-dose versus standard five-day divided-dose dactinomycin in childhood rhabdomyosarcoma. *Journal of Clinical Oncology* 1988;6(4):654-58.
53. Castleberry RP, Cantor AB, Green AA, et al. Phase II investigational window using carboplatin, iproplatin, ifosfamide, and epirubicin in children with untreated disseminated neuroblastoma: a Pediatric Oncology Group study. *Journal of Clinical Oncology* 1994;12(8):1616-20.
54. Castleberry RP, Kun LE, Shuster JJ, et al. Radiotherapy improves the outlook for patients older than 1 year with Pediatric Oncology Group stage C neuroblastoma. *Journal of Clinical Oncology* 1991;9(5):789-95.
55. Chagaluka G, Stanley C, Banda K, et al. Kaposi's sarcoma in children: an open randomised trial of vincristine, oral etoposide and a combination of vincristine and bleomycin. *European journal of cancer* 2014;50(8):1472-81. doi: <http://dx.doi.org/10.1016/j.ejca.2014.02.019>
56. Chan HSL, Correia JA, MacLeod SM. Nabilone versus prochlorperazine for control of cancer chemotherapy-induced emesis in children: A double-blind, crossover trial. *Pediatrics* 1987;79(6):946-52.
57. Chen RW, Li H, Bernstein SH, et al. RB but not R-HCVAD is a feasible induction regimen prior to auto-HCT in frontline MCL: results of SWOG Study S1106. *British Journal of Haematology* 2017;176(5):759-69. doi: <https://dx.doi.org/10.1111/bjh.14480>
58. Cherlow JM, Steinherz PG, Sather HN, et al. The role of radiation therapy in the treatment of acute lymphoblastic leukemia with lymphomatous presentation: a report from the Childrens Cancer Group. *International journal of radiation oncology, biology, physics* 1993;27(5):1001-09.
59. Chessells JM, Bailey C, Richards SM. Intensification of treatment and survival in all children with lymphoblastic leukaemia: results of UK Medical Research Council trial UKALL X. Medical Research Council Working Party on Childhood Leukaemia. *Lancet* 1995;345(8943):143-48.
60. Chessells JM, Durrant J, Hardy RM, et al. Medical Research Council leukaemia trial--UKALL V: an attempt to reduce the immunosuppressive effects of therapy in childhood acute lymphoblastic leukemia. Report to the Council by the Working Party on Leukaemia in Childhood. *Journal of Clinical Oncology* 1986;4(12):1758-64.
61. Chessells JM, Harrison G, Richards SM, et al. Failure of a new protocol to improve treatment results in paediatric lymphoblastic leukaemia: Lessons from the UK Medical Research Council trials UKALL X and UKALL XI. *British journal of haematology* 2002;118(2):445-55.

62. Chou AJ, Kleinerman ES, Krailo MD, et al. Addition of muramyl tripeptide to chemotherapy for patients with newly diagnosed metastatic osteosarcoma: a report from the Children's Oncology Group. *Cancer* 2009;115(22):5339-48. doi: <http://dx.doi.org/10.1002/cncr.24566>
63. Chow EJ, Asselin BL, Schwartz CL, et al. Late Mortality After Dexrazoxane Treatment: A Report From the Children's Oncology Group. *Journal of Clinical Oncology* 2015;33(24):2639-45. doi: <http://dx.doi.org/10.1200/JCO.2014.59.4473>
64. Clarke M, Gaynon P, Hann I, et al. CNS-directed therapy for childhood acute lymphoblastic leukemia: Childhood ALL Collaborative Group overview of 43 randomized trials. *Journal of clinical oncology : official journal of the American Society of Clinical Oncology* 2003;21(9):1798-809.
65. Cohen BH, Zeltzer PM, Boyett JM, et al. Prognostic factors and treatment results for supratentorial primitive neuroectodermal tumors in children using radiation and chemotherapy: a Children's Cancer Group randomized trial. *Journal of Clinical Oncology* 1995;13(7):1687-96.
66. Conner K, Sandler E, Weyman C, et al. Intravenous midazolam versus fentanyl as premedication for painful procedures in pediatric oncology patients. *Journal of Pediatric Oncology Nursing* 1991;8(2):86-87.
67. Connors JM, Jurczak W, Straus DJ, et al. Brentuximab Vedotin with Chemotherapy for Stage III or IV Hodgkin's Lymphoma.[Erratum appears in N Engl J Med. 2018 Mar 1;378(9):878; PMID: 29490175]. *New England Journal of Medicine* 2018;378(4):331-44. doi: <https://dx.doi.org/10.1056/NEJMoa1708984>
68. Conter V, Schrappe M, Arico M, et al. Role of cranial radiotherapy for childhood T-cell acute lymphoblastic leukemia with high WBC count and good response to prednisone. *Journal of Clinical Oncology* 1997;15(8):2786-91.
69. Cortelazzo S, Tarella C, Gianni AM, et al. Randomized Trial Comparing R-CHOP Versus High-Dose Sequential Chemotherapy in High-Risk Patients With Diffuse Large B-Cell Lymphomas. *Journal of Clinical Oncology* 2016;34(33):4015-22. doi: <https://dx.doi.org/10.1200/JCO.2016.67.2980>
70. Couban S, Simpson DR, Barnett MJ, et al. A randomized multicenter comparison of bone marrow and peripheral blood in recipients of matched sibling allogeneic transplants for myeloid malignancies. *Blood* 2002;100(5):1525-31.
71. CoustanSmith E, Sancho J, Hancock ML, et al. Clinical importance of minimal residual disease in childhood acute lymphoblastic leukemia. *Blood* 2000;96(8):2691-96.
72. Coze C, Hartmann O, Michon J, et al. NB87 induction protocol for stage 4 neuroblastoma in children over 1 year of age: a report from the French Society of Pediatric Oncology. *Journal of Clinical Oncology* 1997;15(12):3433-40.
73. Creutzig U, Ritter J, Zimmermann M, et al. Idarubicin improves blast cell clearance during induction therapy in children with AML: Results of study AML-BFM 93. *Leukemia* 2001;15(3):348-54.
74. Creutzig U, Ritter J, Zimmermann M, et al. Does cranial irradiation reduce the risk for bone marrow relapse in acute myelogenous leukemia? Unexpected results of the Childhood Acute Myelogenous Leukemia Study BFM-87. *Journal of Clinical Oncology* 1993;11(2):279-86.
75. Creutzig U, Ritter J, Zimmermann M, et al. Superior results by cranial irradiation in children with acute myelogenous leukemia: An update of study AML-BFM-87. *Onkologie* 1994;17(1):66-68.

76. Creutzig U, Semmler J, Kaspers GL, et al. Re-induction with L-DNR/FLAG improves response after AML relapse, but not long-term survival. *Klinische Padiatrie* 2014;226(6-7):323-31. doi: <http://dx.doi.org/10.1055/s-0034-1385918>
77. Crist W, Boyett J, Jackson J, et al. Prognostic importance of the pre-B-cell immunophenotype and other presenting features in B-lineage childhood acute lymphoblastic leukemia: a Pediatric Oncology Group study. *Blood* 1989;74(4):1252-59.
78. Crist W, Gehan EA, Ragab AH, et al. The Third Intergroup Rhabdomyosarcoma Study. *Journal of Clinical Oncology* 1995;13(3):610-30.
79. Crist W, Shuster J, Look T, et al. Current results of studies of immunophenotype-, age- and leukocyte-based therapy for children with acute lymphoblastic leukemia. *Leukemia* 1992;6(SUPPL. 2):162-66.
80. Culbert SJ, Shuster JJ, Land VJ, et al. Remission induction and continuation therapy in children with their first relapse of acute lymphoid leukemia. A Pediatric Oncology Group study. *Cancer* 1991;67(1):37-42.
81. Cushing B, Giller R, Cullen JW, et al. Randomized comparison of combination chemotherapy with etoposide, bleomycin, and either high-dose or standard-dose cisplatin in children and adolescents with high-risk malignant germ cell tumors: a pediatric intergroup study--Pediatric Oncology Group 9049 and Children's Cancer Group 8882. *Journal of Clinical Oncology* 2004;22(13):2691-700.
82. Dahl GV, Lacayo NJ, Brophy N, et al. Mitoxantrone, etoposide, and cyclospine therapy in pediatric patients with recurrent or refractory acute myeloid leukemia. *Journal of Clinical Oncology* 2000;18(9):1867-75.
83. D'Angio GJ, Evans A, Breslow N. The treatment of Wilms' tumor: Results of the second National Wilms' Tumor Study. *Cancer* 1981;47(9):2302-11.
84. D'Angio GJ, Littman P, Nesbit M. Evaluation of radiation therapy factors in prophylactic central nervous system irradiation for childhood leukemia: A report from the children's cancer study group. *International Journal of Radiation Oncology Biology Physics* 1981;7(8):1031-38.
85. De Camargo B, Franco EL. Single-dose versus fractionated-dose dactinomycin in the treatment of Wilms' tumor: Preliminary results of a clinical trial. *Cancer* 1991;67(12):2990-96.
86. De Camargo B, Franco EL. A randomized clinical trial of single-dose versus fractionated-dose dactinomycin in the treatment of Wilms' tumor: Results after extended follow- up. *Cancer* 1994;73(12):3081-86.
87. de Kraker J, Graf N, van Tinteren H, et al. Reduction of postoperative chemotherapy in children with stage I intermediate-risk and anaplastic Wilms' tumour (SIOP 93-01 trial): a randomised controlled trial. *Lancet* 2004;364(9441):1229-35.
88. De Moerloose B, Suciu S, Bertrand Y, et al. Improved outcome with pulses of vincristine and corticosteroids in continuation therapy of children with average risk acute lymphoblastic leukemia (ALL) and lymphoblastic non-Hodgkin lymphoma (NHL): report of the EORTC randomized phase 3 trial 58951. *Blood* 2010;116(1):36-44. doi: <http://dx.doi.org/10.1182/blood-2009-10-247965>
89. Deutsch M, Thomas PR, Krischer J, et al. Results of a prospective randomized trial comparing standard dose neuraxis irradiation (3,600 cGy/20) with reduced neuraxis irradiation (2,340 cGy/13) in

patients with low-stage medulloblastoma. A Combined Children's Cancer Group-Pediatric Oncology Group Study. *Pediatric neurosurgery* 1996;24(4):167-76.

90. Dharmarajan KV, Friedman DL, Schwartz CL, et al. Patterns of relapse from a phase 3 Study of response-based therapy for intermediate-risk Hodgkin lymphoma (AHOD0031): a report from the Children's Oncology Group. *International journal of radiation oncology, biology, physics* 2015;92(1):60-66. doi: <http://dx.doi.org/10.1016/j.ijrobp.2014.10.042>

91. Dinndorf PA, Gootenberg J, Cohen MH, et al. FDA drug approval summary: Pegaspargase (Oncaspar) for the first-line treatment of children with acute lymphoblastic leukemia (ALL). *Oncologist* 2007;12(8):991-98.

92. Doering EJ, Nitschke R, Haggard ME. Phase II study demonstrating failure of both a five-drug continuous-therapy regimen and a two-drug pulse-therapy regimen in the treatment of metastatic neuroblastoma: Southwest Oncology Group Study 822. *Cancer treatment reports* 1979;63(8):1383-84.

93. Donaldson SS, Asmar L, Breneman J, et al. Hyperfractionated radiation in children with rhabdomyosarcoma - Results of an intergroup rhabdomyosarcoma pilot study. *International Journal of Radiation Oncology Biology Physics* 1995;32(4):903-11.

94. Donaldson SS, Meza J, Breneman JC, et al. Results from the IRS-IV randomized trial of hyperfractionated radiotherapy in children with rhabdomyosarcoma--a report from the IRSG. *International journal of radiation oncology, biology, physics* 2001;51(3):718-28.

95. Donaldson SS, Torrey M, Link MP, et al. A multidisciplinary study investigating radiotherapy in Ewing's sarcoma: end results of POG #8346. Pediatric Oncology Group. *International journal of radiation oncology, biology, physics* 1998;42(1):125-35.

96. Eden OB, Lilleyman JS, Richards S, et al. Results of Medical Research Council Childhood Leukaemia Trial UKALL VIII (report to the Medical Research Council on behalf of the Working Party on Leukaemia in Childhood). *British journal of haematology* 1991;78(2):187-96.

97. Ehlers S, Herbst C, Zimmermann M, et al. Granulocyte colony-stimulating factor (G-CSF) treatment of childhood acute myeloid leukemias that overexpress the differentiation-defective G-CSF receptor isoform IV is associated with a higher incidence of relapse. *Journal of Clinical Oncology* 2010;28(15):2591-97.

98. Einsiedel HG, von Stackelberg A, Hartmann R, et al. Long-term outcome in children with relapsed ALL by risk-stratified salvage therapy: results of trial acute lymphoblastic leukemia-relapse study of the Berlin-Frankfurt-Munster Group 87. *Journal of clinical oncology : official journal of the American Society of Clinical Oncology* 2005;23(31):7942-50.

99. Ekert H, Waters KD, Matthews RN. A randomized study of intermittent chemotherapy with or without BCG inoculation in maintenance therapy of childhood ALL. *Medical and pediatric oncology* 1980;8(4):353-60.

100. Elder JS. Results of the Sixth International Society of Pediatric Oncology Wilms' tumor trial and study: a risk-adapted therapeutic approach in Wilms' tumor. *The Journal of urology* 1994;152(1):271-72.

101. Escherich G, Zimmermann M, Janka-Schaub G. Doxorubicin or daunorubicin given upfront in a therapeutic window are equally effective in children with newly diagnosed acute lymphoblastic leukemia. A randomized comparison in trial CoALL 07-03. *Pediatric Blood and Cancer* 2013;60(2):254-57.

102. Evans AE, Albo V, D'Angio GJ. Cyclophosphamide treatment of patients with localized and regional neuroblastoma. A randomized study. *Cancer* 1976;38(2):655-59.
103. Evans AE, Anderson JR, Lefkowitz-Boudreaux IB, et al. Adjuvant chemotherapy of childhood posterior fossa ependymoma: cranio-spinal irradiation with or without adjuvant CCNU, vincristine, and prednisone: a Childrens Cancer Group study. *Medical & Pediatric Oncology* 1996;27(1):8-14.
104. Evans WE, Crom WR, Stewart CF, et al. Methotrexate systemic clearance influences probability of relapse in children with standard-risk acute lymphocytic leukaemia. *Lancet* 1984;1(8373):359-62.
105. Falsini B, Chiaretti A, Rizzo D, et al. Nerve growth factor improves visual loss in childhood optic gliomas: A randomized, double-blind, phase II clinical trial. *Brain* 2016;139(2):404-14.
106. Feig SA, Ames MM, Sather HN, et al. Comparison of idarubicin to daunomycin in a randomized multidrug treatment of childhood acute lymphoblastic leukemia at first bone marrow relapse: a report from the Children's Cancer Group. *Medical & Pediatric Oncology* 1996;27(6):505-14.
107. Feig SA, Harris RE, Sather HN. Bone marrow transplantation versus chemotherapy for maintenance of second remission of childhood acute lymphoblastic leukemia: A study of the children's cancer group (CCG-1884). *Medical and pediatric oncology* 1997;29(6):534-40.
108. Fernbach DJ, George SL, Sutow WW, et al. Long-term results of reinforcement therapy in children with acute leukemia. *Cancer* 1975;36(5):1552-59.
109. Ferrant A, Hulhoven R, Bosly A, et al. Clinical trials with daunorubicin-DNA and adriamycin-DNA in acute lymphoblastic leukemia of childhood, acute nonlymphoblastic leukemia, and bronchogenic carcinoma. *Cancer Chemotherapy & Pharmacology* 1979;2(1):67-71.
110. Finlay JL, Boyett JM, Yates AJ, et al. Randomized phase III trial in childhood high-grade astrocytoma comparing vincristine, lomustine, and prednisone with the eight-drugs-in-1-day regimen. Childrens Cancer Group. *Journal of Clinical Oncology* 1995;13(1):112-23.
111. Flaherty LE, Othus M, Atkins MB, et al. Southwest Oncology Group S0008: a phase III trial of high-dose interferon Alfa-2b versus cisplatin, vinblastine, and dacarbazine, plus interleukin-2 and interferon in patients with high-risk melanoma--an intergroup study of cancer and leukemia Group B, Children's Oncology Group, Eastern Cooperative Oncology Group, and Southwest Oncology Group. *Journal of Clinical Oncology* 2014;32(33):3771-78. doi: <http://dx.doi.org/10.1200/JCO.2013.53.1590>
112. Flamant F, Rodary C, Voute PA, et al. Primary chemotherapy in the treatment of rhabdomyosarcoma in children: Trial of the international society of pediatric oncology (SIOP) preliminary results. *Radiotherapy and Oncology* 1985;3(3):227-36.
113. Fouladi M, Stewart CF, Blaney SM, et al. A molecular biology and phase II trial of lapatinib in children with refractory CNS malignancies: a pediatric brain tumor consortium study. *Journal of neuro-oncology* 2013;114(2):173-79.
114. Freeman AI, Boyett JM, Glicksman AS, et al. Intermediate-dose methotrexate versus cranial irradiation in childhood acute lymphoblastic leukemia: a ten-year follow-up. *Medical & Pediatric Oncology* 1997;28(2):98-107.



115. Freeman AI, Weinberg V, Brecher ML, et al. Comparison of intermediate-dose methotrexate with cranial irradiation for the post-induction treatment of acute lymphocytic leukemia in children. *New England Journal of Medicine* 1983;308(9):477-84.
116. Freeman CR, Kepner J, Kun LE, et al. A detrimental effect of a combined chemotherapy-radiotherapy approach in children with diffuse intrinsic brain stem gliomas? *International Journal of Radiation Oncology Biology Physics* 2000;47(3):561-64.
117. Freyer DR, Devidas M, La M, et al. Postrelapse survival in childhood acute lymphoblastic leukemia is independent of initial treatment intensity: A report from the Children's Oncology Group. *Blood* 2011;117(11):3010-15.
118. Fujimoto T, Goya H, Nakagawa K. Comparison of high dose infusion of methotrexate (MTX) vs sequential complementary method for maintenance of remission in acute childhood leukemia. A cooperative study. *Proceedings of the American Association for Cancer Research* 1975;16(66):no.257.
119. Gardner H, Grois N, Potschger U, et al. Improved outcome in multisystem Langerhans cell histiocytosis is associated with therapy intensification. *Blood* 2008;111(5):2556-62. doi: 10.1182/blood-2007-08-106211 [published Online First: 2007/12/20]
120. Gamis AS, Alonzo TA, Meshinchi S, et al. Gemtuzumab ozogamicin in children and adolescents with de novo acute myeloid leukemia improves event-free survival by reducing relapse risk: results from the randomized phase III Children's Oncology Group trial AAML0531. *Journal of Clinical Oncology* 2014;32(27):3021-32.
121. Gangopadhyay AN, Rajeev R, Sharma SP, et al. Anterior intratumoural chemotherapy: a newer modality of treatment in advanced solid tumours in children. *Asian Journal of Surgery* 2008;31(4):225-29. doi: [http://dx.doi.org/10.1016/S1015-9584\(08\)60092-5](http://dx.doi.org/10.1016/S1015-9584(08)60092-5)
122. Gautam A, Zhu Y, Ma E, et al. Brentuximab vedotin consolidation post-autologous stem cell transplant in Hodgkin lymphoma patients at risk of residual disease: number needed to treat. *Leukemia & Lymphoma* 2018;59(1):69-76. doi: <https://dx.doi.org/10.1080/10428194.2017.1324160>
123. Gaynon PS, Steinherz PG, Bleyer WA, et al. Intensive therapy for children with acute lymphoblastic leukaemia and unfavourable presenting features. Early conclusions of study CCG-106 by the Childrens Cancer Study Group. *Lancet* 1988;2(8617):921-24.
124. Gaynon PS, Steinherz PG, Bleyer WA, et al. Improved therapy for children with acute lymphoblastic leukemia and unfavorable presenting features: a follow-up report of the Childrens Cancer Group Study CCG-106. *Journal of Clinical Oncology* 1993;11(11):2234-42.
125. George RE, London WB, Cohn SL, et al. Hyperdiploidy plus nonamplified MYCN confers a favorable prognosis in children 12 to 18 months old with disseminated neuroblastoma: a Pediatric Oncology Group study. *Journal of clinical oncology : official journal of the American Society of Clinical Oncology* 2005;23(27):6466-73.
126. Geyer JR, Sposto R, Jennings M, et al. Multiagent chemotherapy and deferred radiotherapy in infants with malignant brain tumors: a report from the Children's Cancer Group. *Journal of Clinical Oncology* 2005;23(30):7621-31.

127. Gibson BES, Webb DKH, Howman AJ, et al. Results of a randomized trial in children with Acute Myeloid Leukaemia: Medical Research Council AML12 trial. *British journal of haematology* 2011;155(3):366-76.
128. Gibson BES, Wheatley K, Hann IM, et al. Treatment strategy and long-term results in paediatric patients treated in consecutive UK AML trials. *Leukemia* 2005;19(12):2130-38.
129. Gilchrist GS, Tubergen DG, Sather HN, et al. Low numbers of CSF blasts at diagnosis do not predict for the development of CNS leukemia in children with intermediate-risk acute lymphoblastic leukemia: A Childrens Cancer Group report. *Journal of Clinical Oncology* 1994;12(12):2594-600.
130. Goldman SC, Holcenberg JS, Finklestein JZ, et al. A randomized comparison between rasburicase and allopurinol in children with lymphoma or leukemia at high risk for tumor lysis. *Blood* 2001;97(10):2998-3003.
131. Goorin AM, Schwartzentruber DJ, Devidas M, et al. Presurgical chemotherapy compared with immediate surgery and adjuvant chemotherapy for nonmetastatic osteosarcoma: Pediatric Oncology Group Study POG-8651. *Journal of Clinical Oncology* 2003;21(8):1574-80.
132. Granowetter L, Womer R, Devidas M, et al. Dose-intensified compared with standard chemotherapy for nonmetastatic Ewing sarcoma family of tumors: a Children's Oncology Group Study. *Journal of Clinical Oncology* 2009;27(15):2536-41. doi: <http://dx.doi.org/10.1200/JCO.2008.19.1478>
133. Green DM, Breslow NE, Beckwith JB, et al. Comparison between single-dose and divided-dose administration of dactinomycin and doxorubicin for patients with Wilms' tumor: a report from the National Wilms' Tumor Study Group. *Journal of Clinical Oncology* 1998;16(1):237-45.
134. Haas-Kogan DA, Swift PS, Selch M, et al. Impact of radiotherapy for high-risk neuroblastoma: a Children's Cancer Group study. *International journal of radiation oncology, biology, physics* 2003;56(1):28-39.
135. Harris MB, Shuster JJ, Carroll A, et al. Trisomy of leukemic cell chromosomes 4 and 10 identifies children with B- progenitor cell acute lymphoblastic leukemia with a very low risk of treatment failure: A Pediatric Oncology Group Study. *Blood* 1992;79(12):3316-24.
136. Harris MB, Shuster JJ, Pullen J, et al. Treatment of children with early pre-B and pre-B acute lymphocytic leukemia with antimetabolite-based intensification regimens: A pediatric oncology group study. *Leukemia* 2000;14(9):1570-76.
137. Hasle H, Abrahamsson J, Forestier E, et al. Gemtuzumab ozogamicin as postconsolidation therapy does not prevent relapse in children with AML: Results from NOPHO-AML 2004. *Blood* 2012;120(5):978-84.
138. Heath JA, Steinherz PG, Altman A, et al. Human granulocyte colony-stimulating factor in children with high-risk acute lymphoblastic leukemia: a Children's Cancer Group Study. *Journal of Clinical Oncology* 2003;21(8):1612-17.
139. Heerema NA, Carroll AJ, Devidas M, et al. Intrachromosomal amplification of chromosome 21 is associated with inferior outcomes in children with acute lymphoblastic leukemia treated in contemporary standard-risk children's oncology group studies: a report from the children's oncology group. *Journal of clinical oncology : official journal of the American Society of Clinical Oncology* 2013;31(27):3397-402.

140. Henze G, Fengler R, Hartmann R, et al. Six-year experience with a comprehensive approach to the treatment of recurrent childhood acute lymphoblastic leukemia (ALL-REZ BFM 85). A relapse study of the BFM group. *Blood* 1991;78(5):1166-72.
141. Horstmann M, Escherich G. Treatment of acute lymphoblastic leucemia of childhood: Interim report CoALL 08-09. *78 Wissenschaftlichen Halbjahrestagung der Gesellschaft fur Padiatrische Onkologie und Hamatologie, GPOH Frankfurt Germany* 2011;159(10):1006-07. doi: <http://dx.doi.org/10.1007/s00112-011-2482-7>
142. Hough R, Rowntree C, Goulden N, et al. Efficacy and toxicity of a paediatric protocol in teenagers and young adults with Philadelphia chromosome negative acute lymphoblastic leukaemia: results from UKALL 2003. *British Journal of Haematology* 2016;172(3):439-51. doi: <https://dx.doi.org/10.1111/bjh.13847>
143. Hutchinson RJ, Fryer CJ, Davis PC, et al. MOPP or radiation in addition to ABVD in the treatment of pathologically staged advanced Hodgkin's disease in children: results of the Children's Cancer Group Phase III Trial. *Journal of Clinical Oncology* 1998;16(3):897-906.
144. Hutchinson RJ, Gaynon PS, Sather H, et al. Intensification of therapy for children with lower-risk acute lymphoblastic leukemia: long-term follow-up of patients treated on Children's Cancer Group Trial 1881. *Journal of Clinical Oncology* 2003;21(9):1790-97.
145. Igarashi S, Manabe A, Ohara A, et al. No advantage of dexamethasone over prednisolone for the outcome of standard- and intermediate-risk childhood acute lymphoblastic leukemia in the Tokyo Children's Cancer Study Group L95-14 protocol. *Journal of Clinical Oncology* 2005;23(27):6489-98.
146. Jabbour E, Short NJ, Ravandi F, et al. A randomized phase 2 study of idarubicin and cytarabine with clofarabine or fludarabine in patients with newly diagnosed acute myeloid leukemia. *Cancer* 2017;123(22):4430-39. doi: <https://dx.doi.org/10.1002/ncr.30883>
147. Jacquillat C, Weil M, Auclerc MF. Application of the study of prognostic factors to the treatment of childhood (<20 years old) acute lymphoblastic leukemia. Protocol 08 LA 74. *Bulletin du cancer* 1980;67(4):458-69.
148. JankaSchaub GE, Winkler K, Gobel U, et al. Rapidly rotating combination chemotherapy in childhood acute lymphoblastic leukemia: Preliminary results of a randomized comparison with conventional treatment. *Leukemia* 1988;2(12 SUPPL):73s-78s.
149. Jaramillo S, Benner A, Krauter J, et al. Condensed versus standard schedule of high-dose cytarabine consolidation therapy with pegfilgrastim growth factor support in acute myeloid leukemia. *Blood Cancer J* 2017;7(5):e564. doi: <https://dx.doi.org/10.1038/bcj.2017.45>
150. Jenkin RD, Boesel C, Ertel I, et al. Brain-stem tumors in childhood: a prospective randomized trial of irradiation with and without adjuvant CCNU, VCR, and prednisone. A report of the Children's Cancer Study Group. *Journal of neurosurgery* 1987;66(2):227-33.
151. Jennings MT, Sposto R, Boyett JM, et al. Preradiation chemotherapy in primary high-risk brainstem tumors: phase II study CCG-9941 of the Children's Cancer Group. *Journal of Clinical Oncology* 2002;20(16):3431-37.

152. Johnson P, Federico M, Kirkwood A, et al. Adapted Treatment Guided by Interim PET-CT Scan in Advanced Hodgkin's Lymphoma. *New England Journal of Medicine* 2016;374(25):2419-29. doi: <https://dx.doi.org/10.1056/NEJMoa1510093>
153. Johnson PWM, Sydes MR, Hancock BW, et al. Consolidation radiotherapy in patients with advanced Hodgkin's lymphoma: Survival data from the UKLG LY09 randomized controlled trial (ISRCTN97144519). *Journal of Clinical Oncology* 2010;28(20):3352-59.
154. Jones PHM, Pearson D, Johnson AL. Management of nephroblastoma in childhood. Clinical study of two forms of maintenance chemotherapy. *Archives of Disease in Childhood* 1978;53(2):112-19.
155. Junjun J, Xuelian Z, Dhruva K, et al. Efficacy of preoperative chemotherapy in treatment of children with wilms' tumor: A meta-analysis. *Iranian Journal of Pediatrics* 2015;25(2) (pagination):Arte Number: e366. ate of Pubaton: 2015. doi: <http://dx.doi.org/10.5812/ijp.366>
156. Kamps WA, Bokkerink JP, Hahlen K, et al. Intensive treatment of children with acute lymphoblastic leukemia according to ALL-BFM-86 without cranial radiotherapy: results of Dutch Childhood Leukemia Study Group Protocol ALL-7 (1988-1991). *Blood* 1999;94(4):1226-36.
157. Kamps WA, Bokkerink JPM, HakvoortCammel FG AJ, et al. BFM-oriented treatment for children with acute lymphoblastic leukemia without cranial irradiation and treatment reduction for standard risk patients: Results of DCLSG protocol ALL-8 (1991-1996). *Leukemia* 2002;16(6):1099-111.
158. Kantarjian HM, DeAngelo DJ, Stelljes M, et al. Inotuzumab Ozogamicin versus Standard Therapy for Acute Lymphoblastic Leukemia. *New England Journal of Medicine* 2016;375(8):740-53. doi: <https://dx.doi.org/10.1056/NEJMoa1509277>
159. Karachunskiy A, Herold R, von Stackelberg A, et al. Results of the first randomized multicentre trial on childhood acute lymphoblastic leukaemia in Russia. *Leukemia* 2008;22(6):1144-53.
160. Karol SE, CoustanSmith E, Cao X, et al. Prognostic factors in children with acute myeloid leukaemia and excellent response to remission induction therapy. *British journal of haematology* 2015;168(1):94-101.
161. Karon M, Freireich EJ, Frei E, et al. The role of vincristine in the treatment of childhood acute leukemia. *Clinical pharmacology and therapeutics* 1966;7(3):332-39.
162. Kaspers GJL, Zimmermann M, Reinhardt D, et al. Improved outcome in pediatric relapsed acute myeloid leukemia: Results of a randomized trial on liposomal daunorubicin by the international BFM study group. *Journal of Clinical Oncology* 2013;31(5):599-607.
163. Kato M, Koh K, Manabe A, et al. No impact of high-dose cytarabine and asparaginase as early intensification with intermediate-risk paediatric acute lymphoblastic leukaemia: results of randomized trial TCCSG study L99-15. *British journal of haematology* 2014;164(3):376-83. doi: <http://dx.doi.org/10.1111/bjh.12632>
164. Katzenstein HM, Krailo MD, Malogolowkin MH, et al. Hepatocellular carcinoma in children and adolescents: results from the Pediatric Oncology Group and the Children's Cancer Group intergroup study. *Journal of Clinical Oncology* 2002;20(12):2789-97.
165. Katzenstein HM, Krailo MD, Malogolowkin MH, et al. Fibrolamellar hepatocellular carcinoma in children and adolescents. *Cancer* 2003;97(8):2006-12.

166. Kawano Y, Takaue Y, Mimaya J, et al. Marginal benefit/disadvantage of granulocyte colony-stimulating factor therapy after autologous blood stem cell transplantation in children: results of a prospective randomized trial. The Japanese Cooperative Study Group of PBSCT. *Blood* 1998;92(11):4040-46.
167. Ko RH, Jones TL, Radvinsky D, et al. Allergic reactions and anti-asparaginase antibodies in children with high-risk acute lymphoblastic leukemia: A children's oncology group report. *Cancer* 2015;121(23):4205-11.
168. Kobrinsky NL, Packer RJ, Boyett JM, et al. Etoposide with or without mannitol for the treatment of recurrent or primarily unresponsive brain tumors: a Children's Cancer Group Study, CCG-9881. *Journal of neuro-oncology* 1999;45(1):47-54.
169. Kohler JA, Imeson J, Ellershaw C, et al. A randomized trial of 13-Cis retinoic acid in children with advanced neuroblastoma after high-dose therapy. *British journal of cancer* 2000;83(9):1124-27.
170. Koizumi S, Fujimoto T. Improvement in treatment of childhood acute lymphoblastic leukemia: a 10-year study by the Children's Cancer and Leukemia Study Group. *International journal of hematology* 1994;59(2):99-112.
171. Koizumi S, Fujimoto T, Oka T, et al. Overview of clinical studies of childhood acute lymphoblastic leukemia for more than ten years by the Japanese Children's Cancer and Leukemia Study Group. *Pediatric hematology and oncology* 1997;14(1):17-28.
172. Koizumi S, Fujimoto T, Takeda T, et al. Comparison of intermittent or continuous methotrexate plus 6-mercaptopurine in regimens for standard-risk acute lymphoblastic leukemia in childhood (JCCLSG-S811). The Japanese Children's Cancer and Leukemia Study Group. *Cancer* 1988;61(7):1292-300.
173. Kojima S, Hibi S, Kosaka Y, et al. Immunosuppressive therapy using antithymocyte globulin, cyclosporine, and danazol with or without human granulocyte colony-stimulating factor in children with acquired aplastic anemia. *Blood* 2000;96(6):2049-54.
174. Kortmann RD, Kuhl J, Timmermann B, et al. Postoperative neoadjuvant chemotherapy before radiotherapy as compared to immediate radiotherapy followed by maintenance chemotherapy in the treatment of medulloblastoma in childhood: results of the German prospective randomized trial HIT '91. *International journal of radiation oncology, biology, physics* 2000;46(2):269-79.
175. Krailo M, Ertel I, Makley J, et al. A randomized study comparing high-dose methotrexate with moderate-dose methotrexate as components of adjuvant chemotherapy in childhood nonmetastatic osteosarcoma: a report from the Children's Cancer Study Group. *Medical & Pediatric Oncology* 1987;15(2):69-77.
176. Kramm C, Roth D, Wolff JEA. First results of the randomized clinical trial HIT-GBM-D for treatment of children and adolescents with high grade glioma. *78 Wissenschaftlichen Halbjahrestagung der Gesellschaft für Pädiatrische Onkologie und Hamatologie, GPOH Frankfurt Germany* 2011;159(10):1005. doi: <http://dx.doi.org/10.1007/s00112-011-2482-7>
177. Krischer J, Land VJ, Civin CI, et al. Evaluation of AMSA in children with acute leukemia. A Pediatric Oncology Group study. *Cancer* 1984;54(2):207-10.

178. Krischer JP, Ragab AH, Kun L, et al. Nitrogen mustard, vincristine, procarbazine, and prednisone as adjuvant chemotherapy in the treatment of medulloblastoma. A Pediatric Oncology Group study. *Journal of neurosurgery* 1991;74(6):905-09.
179. Kuhl J, Muller HL, Berthold F, et al. Preradiation chemotherapy of children and young adults with malignant brain tumors: results of the German pilot trial HIT'88/'89. *Klinische Padiatrie* 1998;210(4):227-33.
180. Kurtzberg J, Asselin B, Bernstein M, et al. Polyethylene Glycol-conjugated L-asparaginase versus native L-asparaginase in combination with standard agents for children with acute lymphoblastic leukemia in second bone marrow relapse: a Children's Oncology Group Study (POG 8866). *Journal of Pediatric Hematology/Oncology* 2011;33(8):610-16. doi: <http://dx.doi.org/10.1097/MPH.0b013e31822d4d4e>
181. Lampkin BC, Woods WG, Buckley JD, et al. Preliminary results of intensive therapy of children and adolescents with acute nonlymphocytic leukemia--a Children's Cancer Study Group report. *Haematology and blood transfusion* 1990;33:210-14.
182. Land VJ, Shuster JJ, Crist WM, et al. Comparison of two schedules of intermediate-dose methotrexate and cytarabine consolidation therapy for childhood B-precursor cell acute lymphoblastic leukemia: a Pediatric Oncology Group study. *Journal of Clinical Oncology* 1994;12(9):1939-45.
183. Land VJ, Thomas PR, Boyett JM, et al. Comparison of maintenance treatment regimens for first central nervous system relapse in children with acute lymphocytic leukemia. A Pediatric Oncology Group study. *Cancer* 1985;56(1):81-87.
184. Landmann E, Burkhardt B, Zimmermann M, et al. Results and conclusions of the European Intergroup EURO-LB02 trial in children and adolescents with lymphoblastic lymphoma. *Haematologica* 2017;102(12):2086-96. doi: <https://dx.doi.org/10.3324/haematol.2015.139162>
185. Lange BJ, Bostrom BC, Cherlow JM, et al. Double-delayed intensification improves event-free survival for children with intermediate-risk acute lymphoblastic leukemia: a report from the Children's Cancer Group. *Blood* 2002;99(3):825-33.
186. Lange BJ, Smith FO, Feusner J, et al. Outcomes in CCG-2961, a children's oncology group phase 3 trial for untreated pediatric acute myeloid leukemia: a report from the children's oncology group. *Blood* 2008;111(3):1044-53.
187. Lannering B, Rutkowski S, Doz F, et al. Hyperfractionated versus conventional radiotherapy followed by chemotherapy in standard-risk medulloblastoma: Results from the randomized multicenter HIT-SIOP PNET 4 trial. *Journal of Clinical Oncology* 2012;30(26):3187-93.
188. Larsen EC, Devidas M, Chen S, et al. Dexamethasone and High-Dose Methotrexate Improve Outcome for Children and Young Adults With High-Risk B-Acute Lymphoblastic Leukemia: A Report From Children's Oncology Group Study AALL0232. *Journal of Clinical Oncology* 2016;34(20):2380-8. doi: <https://dx.doi.org/10.1200/JCO.2015.62.4544>
189. Laskar S, Gupta T, Vimal S, et al. Consolidation radiation after complete remission in Hodgkin's disease following six cycles of doxorubicin, bleomycin, vinblastine, and dacarbazine chemotherapy: is there a need? *J Clin Oncol* 2004;22(1):62-8. doi: 10.1200/jco.2004.01.021 [published Online First: 2003/12/06]

190. Laver JH, Barredo JC, Amylon M, et al. Effects of cranial radiation in children with high risk T cell acute lymphoblastic leukemia: A Pediatric Oncology Group report. *Leukemia* 2000;14(3):369-73.
191. Laver JH, Mahmoud H, Pick TE, et al. Results of a randomized phase III trial in children and adolescents with advanced stage diffuse large cell non Hodgkin's lymphoma: a Pediatric Oncology Group study. *Leukemia & lymphoma* 2001;42(3):399-405.
192. Le Deley MC, Guinebretiere JM, Gentet JC, et al. SFOP OS94: A randomised trial comparing preoperative high-dose methotrexate plus doxorubicin to high-dose methotrexate plus etoposide and ifosfamide in osteosarcoma patients. *European journal of cancer* 2007;43(4):752-61.
193. Lehrnbecher T, Varwig D, Kaiser J, et al. Infectious complications in pediatric acute myeloid leukemia: Analysis of the prospective multi-institutional clinical trial AML-BFM 93. *Leukemia* 2004;18(1):72-77.
194. Lehrnbecher T, Zimmermann M, Reinhardt D, et al. Prophylactic human granulocyte colony-stimulating factor after induction therapy in pediatric acute myeloid leukemia. *Blood* 2007;109(3):936-43.
195. Lemerle J, Voute PA, Tournade MF, et al. Preoperative versus postoperative radiotherapy, single versus multiple courses of actinomycin D, in the treatment of Wilms' tumor. Preliminary results of a controlled clinical trial conducted by the International Society of Paediatric Oncology (S.I.O.P.). *Cancer* 1976;38(2):647-54.
196. Lemerle J, Voute PA, Tournade MF, et al. Effectiveness of preoperative chemotherapy in Wilms' tumor: results of an International Society of Paediatric Oncology (SIOP) clinical trial. *Journal of Clinical Oncology* 1983;1(10):604-09.
197. Lewis IJ, Nooij MA, Whelan J, et al. Improvement in histologic response but not survival in osteosarcoma patients treated with intensified chemotherapy: A randomized phase III trial of the european osteosarcoma intergroup. *Journal of the National Cancer Institute* 2007;99(2):112-28.
198. Li X, Cui Y, Sun Z, et al. DDGP versus SMILE in Newly Diagnosed Advanced Natural Killer/T-Cell Lymphoma: A Randomized Controlled, Multicenter, Open-label Study in China. *Clinical Cancer Research* 2016;22(21):5223-28.
199. Liang DC, Hung IJ, Yang CP, et al. Unexpected mortality from the use of E. coli L-asparaginase during remission induction therapy for childhood acute lymphoblastic leukemia: a report from the Taiwan Pediatric Oncology Group. *Leukemia* 1999;13(2):155-60.
200. Liang DC, Yang CP, Lin DT, et al. Long-term results of Taiwan Pediatric Oncology Group studies 1997 and 2002 for childhood acute lymphoblastic leukemia. *Leukemia* 2010;24(2):397-405. doi: <http://dx.doi.org/10.1038/leu.2009.248>
201. Lilleyman JS, Campbell RHA. Vindesine in relapsed childhood ALL. A pilot study by the United Kingdom children's cancer study group. *European Paediatric Haematology and Oncology* 1984;1(1):37-38.
202. Link MP, Goorin AM, Miser AW. The effect of adjuvant chemotherapy on relapse-free survival in patients with osteosarcoma of the extremity. *New England Journal of Medicine* 1986;314(25):1600-06.
203. Link MP, Shuster JJ, Donaldson SS, et al. Treatment of children and young adults with early-stage non-hodgkin's lymphoma. *New England Journal of Medicine* 1997;337(18):1259-66.

204. Lipshultz SE, Miller TL, Lipsitz SR, et al. Continuous Versus Bolus Infusion of Doxorubicin in Children With ALL: Long-term Cardiac Outcomes. *Pediatrics* 2012;130(6):1003-11. doi: <http://dx.doi.org/10.1542/peds.2012-0727>
205. Lipton JH, Chuah C, Guerci-Bresler A, et al. Ponatinib versus imatinib for newly diagnosed chronic myeloid leukaemia: an international, randomised, open-label, phase 3 trial. *Lancet Oncology* 2016;17(5):612-21. doi: [https://dx.doi.org/10.1016/S1470-2045\(16\)00080-2](https://dx.doi.org/10.1016/S1470-2045(16)00080-2)
206. Littman P, Coccia P, Bleyer WA, et al. Central nervous system (CNS) prophylaxis in children with low risk acute lymphoblastic leukemia (ALL). *International journal of radiation oncology, biology, physics* 1987;13(10):1443-49.
207. Locatelli F, Zecca M, Rondelli R, et al. Graft versus host disease prophylaxis with low-dose cyclosporine-A reduces the risk of relapse in children with acute leukemia given HLA- identical sibling bone marrow transplantation: Results of a randomized trial. *Blood* 2000;95(5):1572-79.
208. London WB, Frantz CN, Campbell LA, et al. Phase II randomized comparison of topotecan plus cyclophosphamide versus topotecan alone in children with recurrent or refractory neuroblastoma: a Children's Oncology Group study. *Journal of Clinical Oncology* 2010;28(24):3808-15. doi: <http://dx.doi.org/10.1200/JCO.2009.27.5016>
209. Loning L, Zimmermann M, Reiter A, et al. Secondary neoplasms subsequent to Berlin-Frankfurt-Munster therapy of acute lymphoblastic leukemia in childhood: Significantly lower risk without cranial radiotherapy. *Blood* 2000;95(9):2770-75.
210. LopezHernandez MA, Alvarado M, De Diego J, et al. A randomized trial of dexamethasone before remission induction, in de novo childhood acute lymphoblastic leukemia. *Haematologica* 2004;89(3):365-66.
211. Lucchese A, Matarese G, Manuelli M, et al. Reliability and efficacy of palifermin in prevention and management of oral mucositis in patients with acute lymphoblastic leukemia: A randomized, double-blind controlled clinical trial. *Minerva stomatologica* 2016;65(1):43-53.
212. MacDonald TJ, Arenson EB, Ater J, et al. Phase II study of high-dose chemotherapy before radiation in children with newly diagnosed high-grade astrocytoma: Final Analysis of Children's Cancer Group Study 9933. *Cancer* 2005;104(12):2862-71.
213. Mahoney Jr DH, Camitta BM, Devidas M. Does intravenous 6-mercaptopurine decrease salvage after relapse in childhood acute lymphoblastic leukemia? [3]. *Pediatric Blood and Cancer* 2006;46(5):660-61.
214. Malogolowkin MH, Katzenstein H, Krailo MD, et al. Intensified platinum therapy is an ineffective strategy for improving outcome in pediatric patients with advanced hepatoblastoma. *Journal of Clinical Oncology* 2006;24(18):2879-84.
215. Manabe A, Tsuchida M, Hanada R, et al. Delay of the diagnostic lumbar puncture and intrathecal chemotherapy in children with acute lymphoblastic leukemia who undergo routine corticosteroid testing: Tokyo Children's Cancer Study Group Study L89-12. *Journal of Clinical Oncology* 2001;19(13):3182-87.
216. Mandell LR, Kadota R, Freeman C, et al. There is no role for hyperfractionated radiotherapy in the management of children with newly diagnosed diffuse intrinsic brainstem tumors: results of a Pediatric



Oncology Group phase III trial comparing conventional vs. hyperfractionated radiotherapy. *International journal of radiation oncology, biology, physics* 1999;43(5):959-64.

217. Marina NM, Pappo AS, Parham DM, et al. Chemotherapy dose-intensification for pediatric patients with Ewing's family of tumors and desmoplastic small round-cell tumors: a feasibility study at St. Jude Children's Research Hospital. *Journal of Clinical Oncology* 1999;17(1):180-90.

218. Maris JM, Weiss MJ, Guo C, et al. Loss of heterozygosity at 1p36 independently predicts for disease progression but not decreased overall survival probability in neuroblastoma patients: A children's cancer group study. *Journal of Clinical Oncology* 2000;18(9):1888-99.

219. Mascarenhas L, Lyden ER, Breitfeld PP, et al. Randomized phase II window trial of two schedules of irinotecan with vincristine in patients with first relapse or progression of rhabdomyosarcoma: a report from the Children's Oncology Group. *Journal of Clinical Oncology* 2010;28(30):4658-63. doi: <http://dx.doi.org/10.1200/JCO.2010.29.7390>

220. Matloub Y, Bostrom BC, Hunger SP, et al. Escalating intravenous methotrexate improves event-free survival in children with standard-risk acute lymphoblastic leukemia: a report from the Children's Oncology Group. *Blood* 2011;118(2):243-51. doi: <http://dx.doi.org/10.1182/blood-2010-12-322909>

221. Matloub Y, Lindemulder S, Gaynon PS, et al. Intrathecal triple therapy decreases central nervous system relapse but fails to improve event-free survival when compared with intrathecal methotrexate: results of the Children's Cancer Group (CCG) 1952 study for standard-risk acute lymphoblastic leukemia, reported by the Children's Oncology Group. *Blood* 2006;108(4):1165-73.

222. Matsuzaki A, Okamura J, Ishii E, et al. Treatment of standard-risk acute lymphoblastic leukemia in children: The results of protocol AL841 from the Kyushu-Yamaguchi Children's Cancer Study Group in Japan. *Pediatric hematology and oncology* 1999;16(3):187-99.

223. Matthay KK, Reynolds CP, Seeger RC, et al. Long-term results for children with high-risk neuroblastoma treated on a randomized trial of myeloablative therapy followed by 13-cis-retinoic acid: a children's oncology group study. *Journal of Clinical Oncology* 2009;27(7):1007-13. doi: <http://dx.doi.org/10.1200/JCO.2007.13.8925>

224. Matthay KK, Villablanca JG, Seeger RC, et al. Treatment of high-risk neuroblastoma with intensive chemotherapy, radiotherapy, autologous bone marrow transplantation, and 13-cis-retinoic acid. Children's Cancer Group. *New England Journal of Medicine* 1999;341(16):1165-73.

225. Maurer HM, Beltangady M, Gehan EA, et al. The Intergroup Rhabdomyosarcoma Study-I. A final report. *Cancer* 1988;61(2):209-20.

226. McWilliams NB, Hayes FA, Green AA, et al. Cyclophosphamide/doxorubicin vs. cisplatin/teniposide in the treatment of children older than 12 months of age with disseminated neuroblastoma: a Pediatric Oncology Group Randomized Phase II study. *Medical & Pediatric Oncology* 1995;24(3):176-80.

227. Meadows AT, Sposto R, Jenkin RD, et al. Similar efficacy of 6 and 18 months of therapy with four drugs (COMP) for localized non-Hodgkin's lymphoma of children: a report from the Children's Cancer Study Group. *Journal of Clinical Oncology* 1989;7(1):92-99.

228. Mehta P, Gardner R, Graham-Pole J, et al. Methylprednisolone is effective in chemotherapy-induced emesis: Results of a double blind randomized trial in children. *Proceedings of the American Association for Cancer Research* 1985;26:No. 602.
229. Meyers PA, Schwartz CL, Krailo M, et al. Osteosarcoma: A randomized, prospective trial of the addition of ifosfamide and/or muramyl tripeptide to cisplatin, doxorubicin, and high-dose methotrexate. *Journal of Clinical Oncology* 2005;23(9):2004-11.
230. Meyers PA, Schwartz CL, Krailo MD, et al. Osteosarcoma: the addition of muramyl tripeptide to chemotherapy improves overall survival--a report from the Children's Oncology Group. *Journal of Clinical Oncology* 2008;26(4):633-38. doi: <http://dx.doi.org/10.1200/JCO.2008.14.0095>
231. Michel G, Landman-Parker J, Auclerc MF, et al. Use of recombinant human granulocyte colony-stimulating factor to increase chemotherapy dose-intensity: a randomized trial in very high-risk childhood acute lymphoblastic leukemia. *Journal of Clinical Oncology* 2000;18(7):1517-24.
232. Michon JM, Hartmann O, Bouffet E, et al. An open-label, multicentre, randomised phase 2 study of recombinant human granulocyte colony-stimulating factor (filgrastim) as an adjunct to combination chemotherapy in paediatric patients with metastatic neuroblastoma. *European journal of cancer* 1998;34(7):1063-69.
233. Miller DR, Coccia PF, Bleyer WA, et al. Early response to induction therapy as a predictor of disease-free survival and late recurrence of childhood acute lymphoblastic leukemia: a report from the Children's Cancer Study Group. *Journal of Clinical Oncology* 1989;7(12):1807-15.
234. Miller DR, Leikin SL, Albo VC, et al. Three versus five years of maintenance therapy are equivalent in childhood acute lymphoblastic leukemia: a report from the Children's Cancer Study Group. *Journal of Clinical Oncology* 1989;7(3):316-25.
235. Milpied N, Deconinck E, Gaillard F, et al. Initial Treatment of Aggressive Lymphoma with High-Dose Chemotherapy and Autologous Stem-Cell Support. *New England Journal of Medicine* 2004;350(13):1287-95.
236. Miser JS, Krailo MD, Tarbell NJ, et al. Treatment of metastatic Ewing's sarcoma or primitive neuroectodermal tumor of bone: evaluation of combination ifosfamide and etoposide--a Children's Cancer Group and Pediatric Oncology Group study. *Journal of Clinical Oncology* 2004;22(14):2873-76.
237. Miser JS, Pritchard DJ, Rock MG, et al. Osteosarcoma in adolescents and young adults: new developments and controversies. The Mayo Clinic studies. *Cancer treatment and research* 1993;62:333-38.
238. Miser JS, Roloff J, Blatt J, et al. Lack of significant activity of 2'-deoxycoformycin alone or in combination with adenine arabinoside in relapsed childhood acute lymphoblastic leukemia. A randomized phase II trial from the Children's Cancer Study Group. *American Journal of Clinical Oncology* 1992;15(6):490-93.
239. Mitchell C, Pritchard-Jones K, Shannon R, et al. Immediate nephrectomy versus preoperative chemotherapy in the management of non-metastatic Wilms' tumour: results of a randomised trial (UKW3) by the UK Children's Cancer Study Group. *European journal of cancer* 2006;42(15):2554-62.
240. Mo XD, Zhang XH, Xu LP, et al. Comparison of outcomes after donor lymphocyte infusion with or without prior chemotherapy for minimal residual disease in acute leukemia/myelodysplastic syndrome

- after allogeneic hematopoietic stem cell transplantation. *Ann Hematol* 2017;96(5):829-38. doi: <https://dx.doi.org/10.1007/s00277-017-2960-7>
241. Mo XD, Zhao XY, Liu DH, et al. Umbilical cord blood transplantation and unmanipulated haploidentical hematopoietic SCT for pediatric hematologic malignances. *Bone marrow transplantation* 2014;49(8):1070-75.
242. Moghrabi A, Levy DE, Asselin B, et al. Results of the Dana-Farber Cancer Institute ALL Consortium Protocol 95-01 for children with acute lymphoblastic leukemia. *Blood* 2007;109(3):896-904.
243. Moorman AV, Ensor HM, Richards SM, et al. Prognostic effect of chromosomal abnormalities in childhood B-cell precursor acute lymphoblastic leukaemia: Results from the UK Medical Research Council ALL97/99 randomised trial. *The Lancet Oncology* 2010;11(5):429-38.
244. Mori T, Fukano R, Saito A, et al. Analysis of Japanese registration from the randomized international trial for childhood anaplastic large cell lymphoma (ALCL99-R1). [*Rinsho ketsueki*] *The Japanese journal of clinical hematology* 2014;55(5):526-33.
245. Moricke A, Reiter A, Zimmermann M, et al. Risk-adjusted therapy of acute lymphoblastic leukemia can decrease treatment burden and improve survival: treatment results of 2169 unselected pediatric and adolescent patients enrolled in the trial ALL-BFM 95. *Blood* 2008;111(9):4477-89. doi: <http://dx.doi.org/10.1182/blood-2007-09-112920>
246. Mott MG, Eden OB, Palmer MK. Adjuvant low dose radiation in childhood non-Hodgkin's lymphoma. (Report from the United Kingdom Children's Cancer Study Group - UKCCSG). *British journal of cancer* 1984;50(4):463-69.
247. Movassaghi N, Higgins G, Pyesmany A. Evaluation of cycloctidine in reinduction and maintenance therapy of children with acute nonlymphocytic leukemia previously treated with cytosine arabinoside: A report from children's cancer study group. *Medical and pediatric oncology* 1984;12(5):352-56.
248. Murphy SB, Hustu HO. A randomized trial of combined modality therapy of childhood non-Hodgkin's lymphoma. *Cancer* 1980;45(4):630-37.
249. Nachman JB, La MK, Hunger SP, et al. Young adults with acute lymphoblastic leukemia have an excellent outcome with chemotherapy alone and benefit from intensive postinduction treatment: a report from the children's oncology group. *Journal of Clinical Oncology* 2009;27(31):5189-94. doi: <http://dx.doi.org/10.1200/JCO.2008.20.8959>
250. Nesbit M, Sather H, Robison L. The duration of chemotherapy for childhood acute lymphoblastic leukemia (ALL): A randomized study of 316 patients. *Proceedings of the American Society of Clinical Oncology* Vol 1982;1:480.
251. Nesbit ME, Jr., Buckley JD, Feig SA, et al. Chemotherapy for induction of remission of childhood acute myeloid leukemia followed by marrow transplantation or multiagent chemotherapy: a report from the Children's Cancer Group. *Journal of Clinical Oncology* 1994;12(1):127-35.
252. Nesbit ME, Sather H, Robison LL, et al. Sanctuary therapy: a randomized trial of 724 children with previously untreated acute lymphoblastic leukemia: A Report from Children's Cancer Study Group. *Cancer research* 1982;42(2):674-80.

253. Nesbit ME, Jr., Sather HN, Robison LL, et al. Presymptomatic central nervous system therapy in previously untreated childhood acute lymphoblastic leukaemia: comparison of 1800 rad and 2400 rad. A report for Children's Cancer Study Group. *Lancet* 1981;1(8218):461-66.
254. Nesbit ME, Jr., Sather HN, Robison LL, et al. Randomized study of 3 years versus 5 years of chemotherapy in childhood acute lymphoblastic leukemia. *Journal of Clinical Oncology* 1983;1(5):308-16.
255. Neudorf S, Sanders J, Koblinsky N, et al. Autologous bone marrow transplantation for children with AML in first remission. *Bone marrow transplantation* 2007;40(4):313-18.
256. Neudorf S, Sanders J, Koblinsky N, et al. Allogeneic bone marrow transplantation for children with acute myelocytic leukemia in first remission demonstrates a role for graft versus leukemia in the maintenance of disease-free survival. *Blood* 2004;103(10):3655-61.
257. Oberlin O, Rey A, Sanchez de Toledo J, et al. Randomized comparison of intensified six-drug versus standard three-drug chemotherapy for high-risk nonmetastatic rhabdomyosarcoma and other chemotherapy-sensitive childhood soft tissue sarcomas: long-term results from the International Society of Pediatric Oncology MMT95 study. *Journal of Clinical Oncology* 2012;30(20):2457-65. doi: <http://dx.doi.org/10.1200/JCO.2011.40.3287>
258. O'Connor D, Bartram J, Enshaei A, et al. Integration of minimal residual disease with other patient risk factors identifies a population with very poor overall survival in pediatric ALL: Results from the UKALL 2003 trial. *57th Annual Meeting of the American Society of Hematology, ASH 2015 San Diego, CA United States* 2015;126(23):1412.
259. Ortega JA, Douglass EC, Feusner JH, et al. Randomized comparison of cisplatin/vincristine/fluorouracil and cisplatin/continuous infusion doxorubicin for treatment of pediatric hepatoblastoma: A report from the Children's Cancer Group and the Pediatric Oncology Group. *Journal of Clinical Oncology* 2000;18(14):2665-75.
260. Ortega JJ, Javier G, Olive T. Treatment of standard- and high-risk childhood acute lymphoblastic leukaemia with two CNS prophylaxis regimens. *Haematology & Blood Transfusion* 1987;30:483-92.
261. Ortega JJ, Ribera JM, Oriol A, et al. Early and delayed consolidation chemotherapy significantly improves the outcome of children with intermediate-risk acute lymphoblastic leukemia. Final results of the prospective randomized PETHEMA ALL-89 TRIAL. *Haematologica* 2001;86(6):586-95.
262. Packer RJ, Gajjar A, Vezina G, et al. Phase III study of craniospinal radiation therapy followed by adjuvant chemotherapy for newly diagnosed average-risk medulloblastoma. *Journal of Clinical Oncology* 2006;24(25):4202-08.
263. Packer RJ, Zhou T, Holmes E, et al. Survival and secondary tumors in children with medulloblastoma receiving radiotherapy and adjuvant chemotherapy: results of Children's Oncology Group trial A9961. *Neuro-oncology* 2013;15(1):97-103. doi: <http://dx.doi.org/10.1093/neuonc/nos267>
264. Parker C, Waters R, Leighton C, et al. Effect of mitoxantrone on outcome of children with first relapse of acute lymphoblastic leukaemia (ALL R3): an open-label randomised trial. *Lancet* 2010;376(9757):2009-17. doi: [http://dx.doi.org/10.1016/S0140-6736\(10\)62002-8](http://dx.doi.org/10.1016/S0140-6736(10)62002-8)

265. Patte C, Auperin A, Gerrard M, et al. Results of the randomized international FAB/LMB96 trial for intermediate risk B-cell non-Hodgkin lymphoma in children and adolescents: it is possible to reduce treatment for the early responding patients. *Blood* 2007;109(7):2773-80.
266. Patte C, Philip T, Rodary C, et al. High survival rate in advanced-stage B-cell lymphomas and leukemias without CNS involvement with a short intensive polychemotherapy: results from the French Pediatric Oncology Society of a randomized trial of 216 children. *Journal of Clinical Oncology* 1991;9(1):123-32.
267. Paulussen M, Craft AW, Lewis I, et al. Results of the EICESS-92 study: Two randomized trials of Ewing's sarcoma treatment - Cyclophosphamide compared with ifosfamide in standard-risk patients and assessment of benefit of etoposide added to standard treatment in high-risk patients. *Journal of Clinical Oncology* 2008;26(27):4385-93.
268. Payandeh M, Najafi S, Shojaiyan FZ, et al. Phase III of Study of R-CHOP-21 vs R-CHOP-14 for Untreated Stage III and IV B-cell Non-Hodgkin's Lymphoma: a Report from Iran. *Asian Pac J Cancer Prev* 2016;17(3):1513-7.
269. Pearson ADJ, Pinkerton CR, Lewis IJ, et al. High-dose rapid and standard induction chemotherapy for patients aged over 1 year with stage 4 neuroblastoma: a randomised trial. *Lancet Oncology* 2008;9(3):247-56. doi: [http://dx.doi.org/10.1016/S1470-2045\(08\)70069-X](http://dx.doi.org/10.1016/S1470-2045(08)70069-X)
270. Perel Y, Auvrignon A, Leblanc T, et al. Impact of addition of maintenance therapy to intensive induction and consolidation chemotherapy for childhood acute myeloblastic leukemia: Results of a prospective randomized trial, LAME 89/91. *Journal of Clinical Oncology* 2002;20(12):2774-82.
271. Pession A, Valsecchi MG, Masera G, et al. Long-term results of a randomized trial on extended use of high dose L-asparaginase for standard risk childhood acute lymphoblastic leukemia. *Journal of Clinical Oncology* 2005;23(28):7161-67.
272. Place AE, Stevenson KE, Vrooman LM, et al. Intravenous pegylated asparaginase versus intramuscular native Escherichia coli L-asparaginase in newly diagnosed childhood acute lymphoblastic leukaemia (DFCI 05-001): a randomised, open-label phase 3 trial. *Lancet Oncology* 2015;16(16):1677-90. doi: [http://dx.doi.org/10.1016/S1470-2045\(15\)00363-0](http://dx.doi.org/10.1016/S1470-2045(15)00363-0)
273. Pollack IF, Hamilton RL, Sobol RW, et al. O6-Methylguanine-DNA methyltransferase expression strongly correlates with outcome in childhood malignant gliomas: Results from the CCG-945 cohort. *Journal of Clinical Oncology* 2006;24(21):3431-37.
274. Pollard JA, Loken M, Gerbing RB, et al. CD33 expression and its association with gemtuzumab ozogamicin response: Results from the randomized phase III children's oncology group trial AAML0531. *Journal of Clinical Oncology* 2016;34(7):747-55.
275. Pratt CB, Maurer HM, Gieser P, et al. Treatment of unresectable or metastatic pediatric soft tissue sarcomas with surgery, irradiation, and chemotherapy: a Pediatric Oncology Group study. *Medical & Pediatric Oncology* 1998;30(4):201-09.
276. Pratt CB, Pappo AS, Gieser P, et al. Role of adjuvant chemotherapy in the treatment of surgically resected pediatric nonrhabdomyosarcomatous soft tissue sarcomas: A Pediatric Oncology Group Study. *Journal of Clinical Oncology* 1999;17(4):1219-26.

277. Pritchard J, Cotterill SJ, Germond SM, et al. High dose melphalan in the treatment of advanced neuroblastoma: Results of a randomised trial (ENSG-1) by the European Neuroblastoma Study Group. *Pediatric Blood and Cancer* 2005;44(4):348-57.
278. Pritchard-Jones K, Bergeron C, de Camargo B, et al. Omission of doxorubicin from the treatment of stage II-III, intermediate-risk Wilms' tumour (SIOP WT 2001): an open-label, non-inferiority, randomised controlled trial. *Lancet* 2015;386(9999):1156-64. doi: [http://dx.doi.org/10.1016/S0140-6736\(14\)62395-3](http://dx.doi.org/10.1016/S0140-6736(14)62395-3)
279. Pui CH, Aur RJA, Bowman WP. Failure of late intensification therapy to improve a poor result in childhood lymphoblastic leukemia. *Cancer research* 1984;44(8):3593-98.
280. Pui CH, Simone JV, Hancock ML, et al. Impact of three methods of treatment intensification on acute lymphoblastic leukemia in children: long-term results of St Jude total therapy study X. *Leukemia* 1992;6(2):150-57.
281. Pulsipher MA, Langholz B, Wall DA, et al. The addition of sirolimus to tacrolimus/methotrexate GVHD prophylaxis in children with ALL: a phase 3 Children's Oncology Group/Pediatric Blood and Marrow Transplant Consortium trial. *Blood* 2014;123(13):2017-25. doi: <http://dx.doi.org/10.1182/blood-2013-10-534297>
282. Raemaekers JM, Andre MP, Federico M, et al. Omitting radiotherapy in early positron emission tomography-negative stage I/II Hodgkin lymphoma is associated with an increased risk of early relapse: Clinical results of the preplanned interim analysis of the randomized EORTC/LYSA/FIL H10 trial. *Journal of clinical oncology : official journal of the American Society of Clinical Oncology* 2014;32(12):1188-94.
283. Ragab AH, Boyett JM, Frankel L, et al. Rubidazole in the treatment of recurrent acute leukemia in children. A Pediatric Oncology Group Study. *Cancer* 1986;57(8):1461-63.
284. Rausen AR, Glidewell O, Cuttner J. Superiority of L-asparaginase combination chemotherapy in advanced acute lymphocytic leukemia of childhood. Randomized comparative trial of combination versus solo therapy. *Cancer clinical trials* 1979;2(2):137-44.
285. Ravindranath Y, Yeager AM, Chang MN, et al. Autologous bone marrow transplantation versus intensive consolidation chemotherapy for acute myeloid leukemia in childhood. Pediatric Oncology Group. *New England Journal of Medicine* 1996;334(22):1428-34.
286. Reinhard H, Semler O, Burger D, et al. Results of the SIOP 93-01/GPOH trial and study for the treatment of patients with unilateral nonmetastatic wilms tumor. *Klinische Padiatrie* 2004;216(3):132-40.
287. Reiter A, Schrappe M, Ludwig WD, et al. Intensive ALL-type therapy without local radiotherapy provides a 90% event-free survival for children with T-cell lymphoblastic lymphoma: A BFM Group report. *Blood* 2000;95(2):416-21.
288. Rescorla F, Billmire D, Stolar C, et al. The effect of cisplatin dose and surgical resection in children with malignant germ cell tumors at the sacrococcygeal region: A pediatric intergroup trial (POG 9049/CCG 8882). *Journal of pediatric surgery* 2001;36(1):12-17.
289. Richards S, Burrett J, Hann I, et al. Improved survival with early intensification: Combined results from The Medical Research Council childhood ALL randomised trials, UKALL X and UKALL XI. *Leukemia* 1998;12(7):1031-36.

290. Richards S, Gray R, Peto R, et al. Duration and intensity of maintenance chemotherapy in acute lymphoblastic leukaemia: Overview of 42 trials involving 12,000 randomised children. *Lancet* 1996;347(9018):1783-88.
291. Rivera G, Avery T, Pratt C. 4' Demethylepipodophyllotoxin 9 (4,6 O 2 thenylidene beta D glucopyranoside) (NSC 122819; VM 26) and 4' demethylepipodophyllotoxin 9 (4,6 O ethylidene beta D glucopyranoside) (NSC 141540; VP 16 213) in childhood cancer: preliminary observations. *CANCER CHEMOTHERREP* 1975;59(4):743-49.
292. Rivera G, Murphy SB, Aur RJA. Recurrent childhood lymphocytic leukemia. Clinical and cytogenetic studies of cytosine arabinoside and methotrexate for maintenance of second hematologic remission. *Cancer* 1978;42(6):2521-28.
293. Rivera GK, Raimondi SC, Hancock ML, et al. Improved outcome in childhood acute lymphoblastic leukaemia with reinforced early treatment and rotational combination chemotherapy. *Lancet* 1991;337(8733):61-66.
294. Rizzari C, Valsecchi MG, Arico M, et al. Effect of protracted high-dose L-asparaginase given as a second exposure in a Berlin-Frankfurt-Munster-based treatment: Results of the randomized 9102 intermediate-risk childhood acute lymphoblastic leukemia study - A report from the Associazione Italiana Ematologia Oncologia Pediatrica. *Journal of Clinical Oncology* 2001;19(5):1297-303.
295. Rodeberg DA, Wharam MD, Lyden ER, et al. Delayed primary excision with subsequent modification of radiotherapy dose for intermediate-risk rhabdomyosarcoma: A report from the Children's Oncology Group Soft Tissue Sarcoma Committee. *International Journal of Cancer* 2015;137(1):204-11.
296. Roos DE, Smith JG. Randomized trial on radiotherapy for paediatric diffuse intrinsic pontine glioma (DIPG). *Radiotherapy & Oncology* 2014;113(3):425. doi: <http://dx.doi.org/10.1016/j.radonc.2014.08.041>
297. Rubnitz JE, Crews KR, Pounds S, et al. Combination of cladribine and cytarabine is effective for childhood acute myeloid leukemia: Results of the St Jude AML97 trial. *Leukemia* 2009;23(8):1410-16.
298. Rutkowski S, von Bueren A, von Hoff K, et al. Prognostic relevance of clinical and biological risk factors in childhood medulloblastoma: results of patients treated in the prospective multicenter trial HIT'91. *Clinical Cancer Research* 2007;13(9):2651-57.
299. Sackmann Muriel F, Svarch E, Pavlovsky S. Alternating pulses of vincristine-prednisone with cytarabine-cyclophosphamide versus vincristine-prednisone in the maintenance therapy of acute lymphoblastic leukemia. *Cancer treatment reports* 1984;68(4):581-86.
300. Sackmann Muriel F, Morgenfeld M, Kvicala R. Hodgkin's disease in childhood. Therapy results in Argentina. *American Journal of Pediatric Hematology/Oncology* 1981;3(3):247-54.
301. Sackmann-Muriel F, Zubizarreta P, Gallo G, et al. Hodgkin disease in children: results of a prospective randomized trial in a single institution in Argentina. *Medical & Pediatric Oncology* 1997;29(6):544-52.
302. Sallan SE, Hitchcock Bryan S, Gelber R. Influence of intensive asparaginase in the treatment of childhood non-T-cell acute lymphoblastic leukemia. *Cancer research* 1983;43(11):5601-07.

303. Schmiegelow K, Bjork O, Glomstein A, et al. Intensification of mercaptopurine/methotrexate maintenance chemotherapy may increase the risk of relapse for some children with acute lymphoblastic leukemia. *Journal of Clinical Oncology* 2003;21(7):1332-39.
304. Schrappe M, Reiter A, Henze G, et al. Prevention of CNS recurrence in childhood ALL: Results with reduced radiotherapy combined with CNS-directed chemotherapy in four consecutive ALL- BFM trials. *Klinische Padiatrie* 1998;210(4):192-99.
305. Schrappe M, Reiter A, Ludwig WD, et al. Improved outcome in childhood acute lymphoblastic leukemia despite reduced use of anthracyclines and cranial radiotherapy: results of trial ALL-BFM 90. German-Austrian-Swiss ALL-BFM Study Group. *Blood* 2000;95(11):3310-22.
306. Sebban C, Browman GP, Lepage E, et al. Prognostic value of early response to chemotherapy assessed by the day 15 bone marrow aspiration in adult acute lymphoblastic leukemia: A prospective analysis of 437 cases and its application for designing induction chemotherapy trials. *Leukemia research* 1995;19(11):861-68.
307. Seibel NL, Steinherz PG, Sather HN, et al. Early postinduction intensification therapy improves survival for children and adolescents with high-risk acute lymphoblastic leukemia: a report from the Children's Oncology Group. *Blood* 2008;111(5):2548-55.
308. Sellar RS, Rowntree C, Vora AJ, et al. Relapse in teenage and young adult (TYA) patients treated on a pediatric minimal residual disease (MRD) stratified protocol is associated with a poor outcome: Results from UKALL2003. *57th Annual Meeting of the American Society of Hematology, ASH 2015 San Diego, CA United States* 2015;126(23):2493.
309. Sertoli MR, Santini G, Chisesi T, et al. MACOP-B versus ProMACE-MOPP in the treatment of advanced diffuse non- Hodgkin's lymphoma: Results of a prospective randomized trial by the Non-Hodgkin's Lymphoma Cooperative Study Group. *Journal of Clinical Oncology* 1994;12(7):1366-74.
310. Sexauer CL, Vietti T, Humphrey GB. Combination chemotherapy study for remission maintenance in ALL: An evaluation of vincristine, cyclophosphamide and vincristine, cyclophosphamide, and BCNU. A Southwest oncology group phase II study. *American Journal of Pediatric Hematology/Oncology* 1981;3(3):255-57.
311. Shamberger RC, Laquaglia MP, Krailo MD, et al. Ewing sarcoma of the rib: results of an intergroup study with analysis of outcome by timing of resection. *Journal of Thoracic & Cardiovascular Surgery* 2000;119(6):1154-61.
312. Shinagawa K, Yanada M, Sakura T, et al. Tamibarotene as maintenance therapy for acute promyelocytic leukemia: Results from a randomized controlled trial. *Journal of Clinical Oncology* 2014;32(33):3729-35.
313. Sievers EL, Lange BJ, Sondel PM, et al. Children's cancer group trials of interleukin-2 therapy to prevent relapse of acute myelogenous leukemia. *The cancer journal from Scientific American* 2000;6(Suppl 1):S39-44.
314. Skapek SX, Ferguson WS, Granowetter L, et al. Vinblastine and methotrexate for desmoid fibromatosis in children: Results of a Pediatric Oncology Group phase II trial. *Journal of Clinical Oncology* 2007;25(5):501-06.



315. Smith FO, Alonzo TA, Gerbing RB, et al. Long-term results of children with acute myeloid leukemia: a report of three consecutive Phase III trials by the Children's Cancer Group: CCG 251, CCG 213 and CCG 2891. *Leukemia* 2005;19(12):2054-62.
316. Souhami RL, Craft AW, Van Der Eijken JW, et al. Randomised trial of two regimens of chemotherapy in operable osteosarcoma: A study of the European Osteosarcoma Intergroup. *Lancet* 1997;350(9082):911-17.
317. Sposto R, Ertel IJ, Jenkin RD, et al. The effectiveness of chemotherapy for treatment of high grade astrocytoma in children: results of a randomized trial. A report from the Children's Cancer Study Group. *Journal of neuro-oncology* 1989;7(2):165-77.
318. Sary J, Zimmermann M, Campbell M, et al. Intensive chemotherapy for childhood acute lymphoblastic leukemia: results of the randomized intercontinental trial ALL IC-BFM 2002. *Journal of Clinical Oncology* 2014;32(3):174-84. doi: <http://dx.doi.org/10.1200/JCO.2013.48.6522>
319. Steinherz PG, Gaynon PS, Breneman JC, et al. Treatment of patients with acute lymphoblastic leukemia with bulky extramedullary disease and T-cell phenotype or other poor prognostic features: randomized controlled trial from the Children's Cancer Group. *Cancer* 1998;82(3):600-12.
320. Steuber CP, Culbert SJ, Ravindranath Y, et al. Therapy of childhood acute nonlymphocytic leukemia: the Pediatric Oncology Group experience (1977-1988). *Haematology and blood transfusion* 1990;33:198-209.
321. Steuber CP, Krischer J, Holbrook T, et al. Therapy of refractory or recurrent childhood acute myeloid leukemia using amsacrine and etoposide with or without azacitidine: a Pediatric Oncology Group randomized phase II study. *Journal of Clinical Oncology* 1996;14(5):1521-25.
322. Stevens MC, Rey A, Bouvet N, et al. Treatment of nonmetastatic rhabdomyosarcoma in childhood and adolescence: third study of the International Society of Paediatric Oncology--SIOP Malignant Mesenchymal Tumor 89. *Journal of clinical oncology : official journal of the American Society of Clinical Oncology* 2005;23(12):2618-28.
323. Stork LC, Matloub Y, Broxson E, et al. Oral 6-mercaptopurine versus oral 6-thioguanine and veno-occlusive disease in children with standard-risk acute lymphoblastic leukemia: report of the Children's Oncology Group CCG-1952 clinical trial. *Blood* 2010;115(14):2740-48. doi: <http://dx.doi.org/10.1182/blood-2009-07-230656>
324. Straus DJ, Portlock CS, Qin J, et al. Results of a prospective randomized clinical trial of doxorubicin, bleomycin, vinblastine, and dacarbazine (ABVD) followed by radiation therapy (RT) versus ABVD alone for stages I, II, and IIIA nonbulky Hodgkin disease. *Blood* 2004;104(12):3483-89.
325. Strother DR, Lafay-Cousin L, Boyett JM, et al. Benefit from prolonged dose-intensive chemotherapy for infants with malignant brain tumors is restricted to patients with ependymoma: a report of the Pediatric Oncology Group randomized controlled trial 9233/34. *Neuro-oncology* 2014;16(3):457-65. doi: <http://dx.doi.org/10.1093/neuonc/not163>
326. Suh C, Kim HJ, Kim SH, et al. Low-dose lenograstim to enhance engraftment after autologous stem cell transplantation: A prospective randomized evaluation of two different fixed doses. *Transfusion* 2004;44(4):533-38.

327. Sullivan MP, Brecher M, Ramirez I, et al. High-dose cyclophosphamide-high-dose methotrexate with coordinated intrathecal therapy for advanced nonlymphoblastic lymphoma of childhood: results of a Pediatric Oncology Group study. *American Journal of Pediatric Hematology/Oncology* 1991;13(3):288-95.
328. Sullivan MP, Chen T, Dymment PG, et al. Equivalence of intrathecal chemotherapy and radiotherapy as central nervous system prophylaxis in children with acute lymphatic leukemia: a pediatric oncology group study. *Blood* 1982;60(4):948-58.
329. Sullivan MP, Fuller LM, Chen T. Intergroup Hodgkin's disease in children study of stages I and II: A preliminary report. *Cancer treatment reports* 1982;66(4):937-47.
330. Suryanarayan K, Shuster JJ, Donaldson SS, et al. Treatment of localized primary non-Hodgkin's lymphoma of bone in children: A Pediatric Oncology Group Study. *Journal of Clinical Oncology* 1999;17(2):456-59.
331. Tait DM, Thornton-Jones H, Bloom HJ, et al. Adjuvant chemotherapy for medulloblastoma: the first multi-centre control trial of the International Society of Paediatric Oncology (SIOP I). *European journal of cancer* 1990;26(4):464-69.
332. Tallen G, Ratei R, Mann G, et al. Long-term outcome in children with relapsed acute lymphoblastic leukemia after time-point and site-of-relapse stratification and intensified short-course multidrug chemotherapy: Results of trial ALL-REZ BFM 90. *Journal of Clinical Oncology* 2010;28(14):2339-47.
333. Tarbell NJ, Friedman H, Polkinghorn WR, et al. High-risk medulloblastoma: a pediatric oncology group randomized trial of chemotherapy before or after radiation therapy (POG 9031). *Journal of Clinical Oncology* 2013;31(23):2936-41. doi: <http://dx.doi.org/10.1200/JCO.2012.43.9984>
334. Taylor RE, Bailey CC, Robinson K, et al. Results of a randomized study of preradiation chemotherapy versus radiotherapy alone for nonmetastatic medulloblastoma: The International Society of Paediatric Oncology/United Kingdom Children's Cancer Study Group PNET-3 Study. *Journal of Clinical Oncology* 2003;21(8):1581-91.
335. Taylor RE, Bailey CC, Robinson KJ, et al. Impact of radiotherapy parameters on outcome in the International Society of Paediatric Oncology/United Kingdom Children's Cancer Study Group PNET-3 study of preradiotherapy chemotherapy for M0-M1 medulloblastoma. *International journal of radiation oncology, biology, physics* 2004;58(4):1184-93.
336. Tebbi CK, London WB, Friedman D, et al. Dexrazoxane-associated risk for acute myeloid leukemia/myelodysplastic syndrome and other secondary malignancies in pediatric Hodgkin's disease. *Journal of Clinical Oncology* 2007;25(5):493-500.
337. Tebbi CK, Mendenhall NP, London WB, et al. Response-dependent and reduced treatment in lower risk Hodgkin lymphoma in children and adolescents, results of P9426: a report from the Children's Oncology Group. *Pediatric Blood & Cancer* 2012;59(7):1259-65. doi: <http://dx.doi.org/10.1002/pbc.24279>
338. Termuhlen AM, Smith LM, Perkins SL, et al. Disseminated lymphoblastic lymphoma in children and adolescents: results of the COG A5971 trial: a report from the Children's Oncology Group. *British journal of haematology* 2013;162(6):792-801. doi: <http://dx.doi.org/10.1111/bjh.12460>

339. Testi AM, Biondi A, Lo Coco F, et al. GIMEMA-AIEOP AIDA protocol for the treatment of newly diagnosed acute promyelocytic leukemia (APL) in children. *Blood* 2005;106(2):447-53.
340. Tolar J, Bostrom BC, La MK, et al. Intravenous 6-mercaptopurine decreases salvage after relapse in childhood acute lymphoblastic leukemia: a report from the Children's Cancer Group study CCG 1922. *Pediatric Blood & Cancer* 2005;45(1):5-9.
341. Tournade MF, ComNougue C, De Kraker J, et al. Optimal duration of preoperative therapy in unilateral and nonmetastatic Wilms' tumor in children older than 6 months: Results of the Ninth International Society of Pediatric Oncology Wilms' Tumor Trial and Study. *Journal of Clinical Oncology* 2001;19(2):488-500.
342. Tournade MF, Com-Nougue C, Voute PA, et al. Results of the Sixth International Society of Pediatric Oncology Wilms' Tumor Trial and Study: a risk-adapted therapeutic approach in Wilms' tumor. *Journal of Clinical Oncology* 1993;11(6):1014-23.
343. Tower RL, Jones TL, Camitta BM, et al. Dose intensification of methotrexate and cytarabine during intensified continuation chemotherapy for high-risk B-precursor acute lymphoblastic leukemia: POG 9406: a report from the Children's Oncology Group. *Journal of Pediatric Hematology/Oncology* 2014;36(5):353-61. doi: <http://dx.doi.org/10.1097/MPH.0000000000000131>
344. Tsuchida M, Akatsuka J, Bessho F, et al. Treatment of acute lymphoblastic leukemia in the Tokyo Children's Cancer Study Group--preliminary results of L84-11 protocol. *Acta Paediatrica Japonica* 1991;33(4):522-32.
345. Tsuchida M, Ohara A, Manabe A, et al. Long-term results of Tokyo children's cancer study group trials for childhood acute lymphoblastic leukemia, 1984-1999. *Leukemia* 2010;24(2):383-96.
346. Tsukada M, Komiyama A, Nakazawa S, et al. Treatment of standard risk acute lymphoblastic leukemia in children with the Tokyo Children Cancer Study Group (TCCSG) L84-11 protocol in Japan. *International journal of hematology* 1993;57(1):1-7.
347. Tsurusawa M, Katano N, Yamamoto Y, et al. Improvement in CNS protective treatment in non-high-risk childhood acute lymphoblastic leukemia: report from the Japanese Children's Cancer and Leukemia Study Group. *Medical & Pediatric Oncology* 1999;32(4):259-56.
348. Tsurusawa M, Watanabe T, Gosho M, et al. Randomized study of granulocyte colony stimulating factor for childhood B-cell non-Hodgkin lymphoma: a report from the Japanese pediatric leukemia/lymphoma study group B-NHL03 study. *Leukemia & Lymphoma* 2016;57(7):1657-64. doi: <https://dx.doi.org/10.3109/10428194.2015.1106534>
349. Tubergen DG, Gilchrist GS, O'Brien RT, et al. Prevention of CNS disease in intermediate-risk acute lymphoblastic leukemia: comparison of cranial radiation and intrathecal methotrexate and the importance of systemic therapy: a Children's Cancer Group report. *Journal of Clinical Oncology* 1993;11(3):520-26.
350. Tubergen DG, Krailo MD, Meadows AT, et al. Comparison of treatment regimens for pediatric lymphoblastic non-Hodgkin's lymphoma: a Children's Cancer Group study. *Journal of Clinical Oncology* 1995;13(6):1368-76.
351. Tulstrup M, Frandsen TL, Abrahamsson J, et al. Individualized 6-mercaptopurine increments in consolidation treatment of childhood acute lymphoblastic leukemia: A NOPHO randomized controlled trial. *Eur J Haematol* 2018;100(1):53-60. doi: <https://dx.doi.org/10.1111/ejh.12979>

352. Van Eys J, Berry D, Crist W, et al. Treatment intensity and outcome for children with acute lymphocytic leukemia of standard risk. A Pediatric Oncology Group Study. *Cancer* 1989;63(8):1466-71.
353. Van Eys J, Chen T, Moore T. Adjuvant chemotherapy for medulloblastoma and ependymoma using Iv vincristine, intrathecal methotrexate, and intrathecal hydrocortisone: A southwest oncology group study. *Cancer treatment reports* 1981;65(7-8):681-84.
354. Vilmer E, Suci S, Ferster A, et al. Long-term results of three randomized trials (58831, 58832, 58881) in childhood acute lymphoblastic leukemia: A CLCG-EORTC report. *Leukemia* 2000;14(12):2257-66.
355. Vitolo U, Trneny M, Belada D, et al. Obinutuzumab or Rituximab Plus Cyclophosphamide, Doxorubicin, Vincristine, and Prednisone in Previously Untreated Diffuse Large B-Cell Lymphoma. *Journal of Clinical Oncology* 2017;35(31):3529-37. doi: <https://dx.doi.org/10.1200/JCO.2017.73.3402>
356. Von Bueren AO, Von Hoff K, Pietsch T, et al. Treatment of young children with localized medulloblastoma by chemotherapy alone: Results of the prospective, multicenter trial HIT 2000 confirming the prognostic impact of histology. *Neuro-oncology* 2011;13(6):669-79.
357. von Hoff K, Hinkes B, Gerber NU, et al. Long-term outcome and clinical prognostic factors in children with medulloblastoma treated in the prospective randomised multicentre trial HIT'91. *European journal of cancer* 2009;45(7):1209-17. doi: <http://dx.doi.org/10.1016/j.ejca.2009.01.015>
358. Vora A, Goulden N, Wade R, et al. Treatment reduction for children and young adults with low-risk acute lymphoblastic leukaemia defined by minimal residual disease (UKALL 2003): a randomised controlled trial. *Lancet Oncology* 2013;14(3):199-209. doi: [http://dx.doi.org/10.1016/S1470-2045\(12\)70600-9](http://dx.doi.org/10.1016/S1470-2045(12)70600-9)
359. Vora AJ, Mitchell C, Goulden N, et al. UKALL 2003, a randomised trial investigating treatment reduction for children and young adults with minimal residual disease defined low risk acute lymphoblastic leukaemia. *52nd Annual Meeting of the American Society of Hematology, ASH 2010 Orlando, FL United States* 2010;116 (21) (no pagination)
360. Vose JM, Carter S, Burns LJ, et al. Phase III randomized study of rituximab/carmustine, etoposide, cytarabine, and melphalan (BEAM) compared with iodine-131 tositumomab/BEAM with autologous hematopoietic cell transplantation for relapsed diffuse large B-cell lymphoma: results from the BMT CTN 0401 trial. *Journal of clinical oncology : official journal of the American Society of Clinical Oncology* 2013;31(13):1662-68.
361. Vrooman LM, Neuberg DS, Stevenson KE, et al. The low incidence of secondary acute myelogenous leukaemia in children and adolescents treated with dexrazoxane for acute lymphoblastic leukaemia: a report from the Dana-Farber Cancer Institute ALL Consortium. *European journal of cancer* 2011;47(9):1373-79. doi: <http://dx.doi.org/10.1016/j.ejca.2011.03.022>
362. Vrooman LM, Stevenson KE, Supko JG, et al. Postinduction dexamethasone and individualized dosing of Escherichia Coli L-asparaginase each improve outcome of children and adolescents with newly diagnosed acute lymphoblastic leukemia: results from a randomized study--Dana-Farber Cancer Institute ALL Consortium Protocol 00-01. *Journal of Clinical Oncology* 2013;31(9):1202-10. doi: <http://dx.doi.org/10.1200/JCO.2012.43.2070>

363. Vu K, Busaidy N, Cabanillas ME, et al. A randomized controlled trial of an intensive insulin regimen in patients with hyperglycemic acute lymphoblastic leukemia. *Clinical Lymphoma, Myeloma and Leukemia* 2012;12(5):355-62.
364. Waber DP, Silverman LB, Catania L, et al. Outcomes of a randomized trial of hyperfractionated cranial radiation therapy for treatment of high-risk acute lymphoblastic leukemia: Therapeutic efficacy and neurotoxicity. *Journal of Clinical Oncology* 2004;22(13):2701-07.
365. Weiner MA, Leventhal B, Brecher ML, et al. Randomized study of intensive MOPP-ABVD with or without low-dose total-nodal radiation therapy in the treatment of stages IIB, IIIA2, IIIB, and IV Hodgkin's disease in pediatric patients: a Pediatric Oncology Group study. *Journal of Clinical Oncology* 1997;15(8):2769-79.
366. Weiner MA, Leventhal BG, Marcus R, et al. Intensive chemotherapy and low-dose radiotherapy for the treatment of advanced-stage Hodgkin's disease in pediatric patients: A Pediatric Oncology Group study. *Journal of Clinical Oncology* 1991;9(9):1591-98.
367. Wells RJ, Woods WG, Buckley JD, et al. Therapy for acute myeloid leukemia: intensive timing of induction chemotherapy. *Current oncology reports* 2000;2(6):524-28.
368. Wells RJ, Woods WG, Buckley JD, et al. Treatment of newly diagnosed children and adolescents with acute myeloid leukemia: A Childrens Cancer Group study. *Journal of Clinical Oncology* 1994;12(11):2367-77.
369. Winick NJ, Smith SD, Shuster J, et al. Treatment of CNS relapse in children with acute lymphoblastic leukemia: A Pediatric Oncology Group study. *Journal of Clinical Oncology* 1993;11(2):271-78.
370. Winkler K, Beron G, Delling G, et al. Neoadjuvant chemotherapy of osteosarcoma: Results of a randomized cooperative trial (COSS-82) with salvage chemotherapy based on histological tumor response. *Journal of Clinical Oncology* 1988;6(2):329-37.
371. Winter SS, Dunsmore KP, Devidas M, et al. Safe integration of nelarabine into intensive chemotherapy in newly diagnosed T-cell acute lymphoblastic leukemia: Children's Oncology Group Study AALL0434. *Pediatric Blood & Cancer* 2015;62(7):1176-83. doi: <http://dx.doi.org/10.1002/pbc.25470>
372. Woessmann W, Seidemann K, Mann G, et al. The impact of the methotrexate administration schedule and dose in the treatment of children and adolescents with B-cell neoplasms: a report of the BFM Group Study NHL-BFM95. *Blood* 2005;105(3):948-58.
373. Wolden SL, Chen L, Kelly KM, et al. Long-term results of CCG 5942: a randomized comparison of chemotherapy with and without radiotherapy for children with Hodgkin's lymphoma--a report from the Children's Oncology Group. *Journal of Clinical Oncology* 2012;30(26):3174-80. doi: <http://dx.doi.org/10.1200/JCO.2011.41.1819>
374. Wolden SL, Lyden ER, Arndt CA, et al. Local Control for Intermediate-Risk Rhabdomyosarcoma: Results From D9803 According to Histology, Group, Site, and Size: A Report From the Children's Oncology Group. *International journal of radiation oncology, biology, physics* 2015;93(5):1071-76. doi: <http://dx.doi.org/10.1016/j.ijrobp.2015.08.040>

375. Wolff JA, D'Angio G, Hartmann J, et al. Long-term evaluation of single versus multiple courses of actinomycin D therapy of Wilm's tumor. *The New England journal of medicine* 1974;290(2):84-86.
376. Wolff JA, Newton WA, Jr., Krivit W, et al. Single versus multiple dose dactinomycin therapy of Wilms's tumor. A controlled co-operative study conducted by the Children's Cancer Study Group A (formerly Acute Leukemia Co-operative Chemotherapy Group A). *New England Journal of Medicine* 1968;279(6):290-94.
377. Womer RB, West DC, Krailo MD, et al. Randomized controlled trial of interval-compressed chemotherapy for the treatment of localized Ewing sarcoma: a report from the Children's Oncology Group. *Journal of Clinical Oncology* 2012;30(33):4148-54. doi: <http://dx.doi.org/10.1200/JCO.2011.41.5703>
378. Woods WG, Barnard DR, Alonzo TA, et al. Prospective study of 90 children requiring treatment for juvenile myelomonocytic leukemia or myelodysplastic syndrome: A report from the Children's Cancer Group. *Journal of Clinical Oncology* 2002;20(2):434-40.
379. Woods WG, Neudorf S, Gold S, et al. A comparison of allogeneic bone marrow transplantation, autologous bone marrow transplantation, and aggressive chemotherapy in children with acute myeloid leukemia in remission: A report from the Children's Cancer Group. *Blood* 2001;97(1):56-62.
380. Wu J, Song Y, Su L, et al. Rituximab plus chemotherapy as first-line treatment in Chinese patients with diffuse large B-cell lymphoma in routine practice: a prospective, multicentre, non-interventional study. *BMC Cancer* 2016;16:537. doi: <https://dx.doi.org/10.1186/s12885-016-2523-7>
381. Yang CP, Lin ST, Liang DC, et al. Treatment of childhood acute lymphoblastic leukemia with protocol TCL-842 in Taiwan: the Taiwan Children's Cancer Study Group. *Journal of the Formosan Medical Association* 1993;92(5):431-39.
382. Yetgin S, Tuncer MA, Cetin M, et al. Benefit of high-dose methylprednisolone in comparison with conventional-dose prednisolone during remission induction therapy in childhood acute lymphoblastic leukemia for long-term follow-up. *Leukemia* 2003;17(2):328-33.
383. Yu AL, Gilman AL, Ozkaynak MF, et al. Anti-GD2 antibody with GM-CSF, interleukin-2, and isotretinoin for neuroblastoma. *N Engl J Med* 2010;363(14):1324-34. doi: 10.1056/NEJMoa0911123 [published Online First: 2010/10/01]
384. Zaghoul MS, Eldebawy E, Ahmed S, et al. Hypofractionated conformal radiotherapy for pediatric diffuse intrinsic pontine glioma (DIPG): a randomized controlled trial. *Radiotherapy & Oncology* 2014;111(1):35-40. doi: <http://dx.doi.org/10.1016/j.radonc.2014.01.013>
385. Zeltzer PM, Boyett JM, Finlay JL, et al. Metastasis stage, adjuvant treatment, and residual tumor are prognostic factors for medulloblastoma in children: conclusions from the Children's Cancer Group 921 randomized phase III study. *Journal of Clinical Oncology* 1999;17(3):832-45.
386. Zhang L, Jia S, Ma Y, et al. Efficacy and safety of cisplatin, dexamethasone, gemcitabine and pegaspargase (DDGP) regimen in newly diagnosed, advanced-stage extranodal natural killer/T-cell lymphoma: Interim analysis of a phase 4 study NCT01501149. *Oncotarget* 2016;7(34):55721-31. doi: <http://dx.doi.org/10.18632/oncotarget.10124>

387. Zintl F, Plenert W, Malke H. Results of acute lymphoblastic leukemia therapy in childhood with a modified BFM protocol in a multicenter study in the German Democratic Republic. *Haematology & Blood Transfusion* 1987;30:471-79.

Appendix C: Recommendation on how to calculate and assess the number needed to treat to inform decision-making

**Step 1:**

Identify the delta value reported in the sample size calculation and whether the authors reported on the way in which the delta value was chosen. A delta value informed by a previous trial or systematic review should be given more confidence in comparison to one from pilot data or clinical expertise. If no explanation is provided for the delta value, make the assumption that the delta value represents the absolute difference required that would result in a change in clinical practice, while exercising caution that the delta value may have been more influenced by feasibility than clinical evidence. The threshold NNT will correspond to the inverse of the absolute difference unless otherwise stated.

---

**Step 2:**

Identify the experimental and control estimates and calculate the ARR and NNT, along with 95% confidence limits as recommended by Altman & Anderson<sup>19</sup>. If the confidence limits, the standard error, or the number of patients at risk at specific time points (in the case of time to event outcomes), are not reported, then the 95% confidence limits of the NNT cannot be calculated.

---

**Step 3:**

Apply the following algorithm to determine the clinical significance of the NNT. Plot the ARR and NNT, along with 95% confidence limits and the threshold NNT using a forest plot.

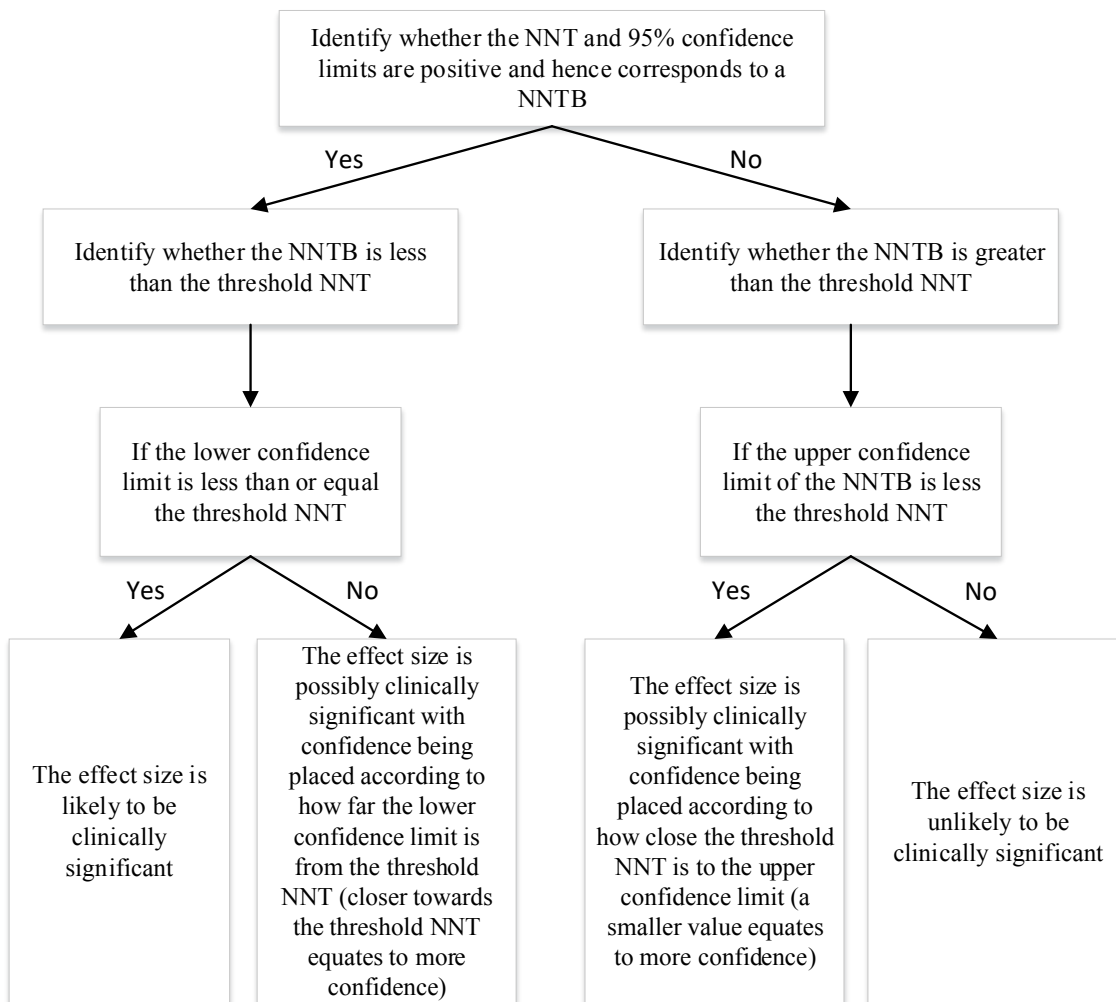

---

**Step 4:**

In order to assess whether the NNTB arising from a RCT can be of significance, the following conditions should be satisfied in the population of interest:

- Baseline risk is comparable
- Outcome and time point are identical
